# Supplementary material
Source: PubMed Central journal article supplement (PMC6643604)
Supplement: ao8b02213_si_001.pdf [file ao8b02213_si_001.pdf]

# *Supporting Information*

For

## *Performance of DFTB in comparison to ab initio and first principles methods for isomer geometries and energies of glucose epimers in vacuo and solution*

Ka Hung Lee,<sup>†,‡</sup> Udo Schnupf,<sup>\*,§</sup> Bobby G. Sumpter,<sup>□,¶</sup> and Stephan Irle<sup>\*,†,□</sup>

<sup>†</sup>Department of Chemistry, Graduate School of Science, Nagoya University, Nagoya 464-8602, Japan

<sup>‡</sup>Bredesen Center for Interdisciplinary Research and Graduate Education, University of Tennessee, Knoxville, TN 37996, U.S.A.

<sup>§</sup>Department of Chemistry and Biochemistry, Bradley University, Peoria, IL 61625, U.S.A.

<sup>□</sup>Computational Sciences and Engineering Division & Chemical Sciences Division, Oak Ridge National Laboratory, Oak Ridge, TN 37831, U.S.A.

<sup>¶</sup>Center for Nanophase Materials Sciences, Oak Ridge National Laboratory, Oak Ridge, TN 37831, U.S.A.

### **Table of Contents**

Page S5. **Figure S1.** The ball and stick representations of the 8 different  $\alpha$ -**D**-aldopyranoses.

Page S7. **Tables S1 and Table S2.** The number of vacuum and implicitly solvated structures studied in this investigation.

\*Corresponding authors. E-mail: [uschnupf@bradley.edu](mailto:uschnupf@bradley.edu) (U.S.); [irles@ornl.gov](mailto:irles@ornl.gov) (S.I.)

Page S8. **Figure S2.** *Ab initio* and first principles single point isomer energies between large and small basis sets.

Page S10. Cartesian coordinates and energies of the structures studied in Figure S3 in xyz format, extracted using OpenBabel. The units of given are in Hartree for energy Angstrom for distance for the following structures:

- **1.** B3LYP/6-311++G(d,p)-optimized geometry of allose,  $\alpha$ -tg-(g-), 'cOcc'
- **2.** B3LYP/6-311++G(d,p)-optimized geometry of allose,  $\beta$ -gg-(g+), 'rrrr'
- **3.** B3LYP/6-311++G(d,p)-optimized geometry of altrose,  $\alpha$ -tg-(g-), 'rcrc'
- **4.** B3LYP/6-311++G(d,p)-optimized geometry of altrose,  $\beta$ -tg-(t), 'cOcc'
- **5.** B3LYP/6-311++G(d,p)-optimized geometry of galactose,  $\alpha$ -gg-(g+), 'cccc'
- **6.** B3LYP/6-311++G(d,p)-optimized geometry of galactose,  $\beta$ -gt-(g-), 'rrrr'
- **7.** B3LYP/6-311++G(d,p)-optimized geometry of glucose,  $\alpha$ -gt-(g-), 'rrrr'
- **8.** B3LYP/6-311++G(d,p)-optimized geometry of glucose,  $\beta$ -gg-(g+), 'rrrr'
- **9.** B3LYP/6-311++G(d,p)-optimized geometry of gulose,  $\alpha$ -gg-(g+), 'rcrc'
- **10.** B3LYP/6-311++G(d,p)-optimized geometry of gulose,  $\beta$ -gg-(g+), 'rrrc'
- **11.** B3LYP/6-311++G(d,p)-optimized geometry of idose,  $\alpha$ -gg-(g+), 'cccc'
- **12.** B3LYP/6-311++G(d,p)-optimized geometry of idose,  $\beta$ -gg-(g+), 'cccc'
- **13.** B3LYP/6-311++G(d,p)-optimized geometry of mannose,  $\alpha$ -gg-(g+), 'rcrc'
- **14.** B3LYP/6-311++G(d,p)-optimized geometry of mannose,  $\beta$ -gg-(g+), 'cccc'
- **15.** B3LYP/6-311++G(d,p)-optimized geometry of talose,  $\alpha$ -gg-(g+), 'rcrc'
- **16.** B3LYP/6-311++G(d,p)-optimized geometry of talose,  $\beta$ -gg-(g+), 'ccrc'
- **17.** B3LYP-PCM/6-311++G(d,p)-optimized geometry of allose,  $\alpha$ -tg-(g-), 'cOcc'
- **18.** B3LYP-PCM/6-311++G(d,p)-optimized geometry of allose,  $\beta$ -gt-(g-), 'rrrr'

- **19.** B3LYP-PCM/6-311++G(d,p)-optimized geometry of altrose,  $\alpha$ -tg-(t), 'crcc'
- **20.** B3LYP-PCM/6-311++G(d,p)-optimized geometry of altrose,  $\beta$ -tg-(t), 'cccc'
- **21.** B3LYP-PCM/6-311++G(d,p)-optimized geometry of galactose,  $\alpha$ -gg-(g-), 'rrrr'
- **22.** B3LYP-PCM/6-311++G(d,p)-optimized geometry of galactose,  $\beta$ -gg-(g-), 'rrrr'
- **23.** B3LYP-PCM/6-311++G(d,p)-optimized geometry of glucose,  $\alpha$ -tg-(g+), 'rrrr'
- **24.** B3LYP-PCM/6-311++G(d,p)-optimized geometry of glucose,  $\beta$ -gg-(g+), 'rrrr'
- **25.** B3LYP-PCM/6-311++G(d,p)-optimized geometry of gulose,  $\alpha$ -gg-(g+), 'rcrc'
- **26.** B3LYP-PCM/6-311++G(d,p)-optimized geometry of gulose,  $\beta$ -gg-(g+), 'Orrc'
- **27.** B3LYP-PCM/6-311++G(d,p)-optimized geometry of idose  $\alpha$ -gg-(g+), 'cccc'
- **28.** B3LYP-PCM/6-311++G(d,p)-optimized geometry of idose  $\beta$ -gg-(g+), 'cccc'
- **29.** B3LYP-PCM/6-311++G(d,p)-optimized geometry of mannose,  $\alpha$ -tg-(g+), 'rrrr'
- **30.** B3LYP-PCM/6-311++G(d,p)-optimized geometry of mannose,  $\beta$ -tg-(t), 'cccc'
- **31.** B3LYP-PCM/6-311++G(d,p)-optimized geometry of talose,  $\alpha$ -gg-(g+), 'rcrc'
- **32.** B3LYP-PCM/6-311++G(d,p)-optimized geometry of talose,  $\beta$ -gg-(g+), 'ccOc'

Page S30. **Figure S3 and S4.** The ball and stick representations of cyclohexanol, 1,2- and 1,3-cyclohexanediols studied in this investigation.

Page S31. **Figure S5.** The distribution of hydrogen bond distances for optimized DFTB2, DFTB3, and B3LYP geometries in vacuum and in implicit solvent.

Page S32. **Figure S6.** Graphical comparison of  $\Delta E_{\text{isomer}}$  between DFT, DFT-D3, DFTB and DFTB-D3 vs. G3B3 energies.

Page S32. **Table S3.** MAD/RMSD/MSD/MAX comparison between B3LYP and B3LYP-D3(BJ)  $\Delta E_{\text{isomer}}$ .

Page S33. **Figure S7.** Graphical comparison of  $\delta E_{\text{isomer}}$  between B3LYP and B3LYP-D3(BJ).

Page S34. **Table S4.** MAD/RMSD/MSD/MAX comparison between B3LYP and B3LYP-D3(BJ)

$\delta E_{\text{isomer}}$ .

Page S34. **Figure S8.** Torsional potential plots and hydrogen bond contributions for B3LYP, DFTB2-D3H4, DFTB3-D3(BJ), and B3LYP-D3(BJ).

Page S34. Cartesian coordinates and energies in xyz format, extracted using OpenBabel. The units of given are in Hartree for energy Angstrom for distance for the following structures:

- **33.** B3LYP-D3(BJ)/6-311++G(d,p)-optimized geometry of allose,  $\alpha$ -tg-(g-), 'cOcc'
- **34.** B3LYP-D3(BJ)/6-311++G(d,p)-optimized geometry of allose,  $\beta$ -gg-(g+), 'rrrr'
- **35.** B3LYP-D3(BJ)/6-311++G(d,p)-optimized geometry of altrose,  $\alpha$ -tg-(g-), 'rcrc'
- **36.** B3LYP-D3(BJ)/6-311++G(d,p)-optimized geometry of altrose,  $\beta$ -tg-(t), 'cOcc'
- **37.** B3LYP-D3(BJ)/6-311++G(d,p)-optimized geometry of galactose,  $\alpha$ -gg-(g+), 'cccc'
- **38.** B3LYP-D3(BJ)/6-311++G(d,p)-optimized geometry of galactose,  $\beta$ -gt-(g-), 'rrrr'
- **39.** B3LYP-D3(BJ)/6-311++G(d,p)-optimized geometry of glucose,  $\alpha$ -gt-(g-), 'rrrr'
- **40.** B3LYP-D3(BJ)/6-311++G(d,p)-optimized geometry of glucose,  $\beta$ -gg-(g+), 'rrrr'
- **41.** B3LYP-D3(BJ)/6-311++G(d,p)-optimized geometry of gulose,  $\alpha$ -gg-(g+), 'rcrc'
- **42.** B3LYP-D3(BJ)/6-311++G(d,p)-optimized geometry of gulose,  $\beta$ -gg-(g+), 'rrrc'
- **43.** B3LYP-D3(BJ)/6-311++G(d,p)-optimized geometry of idose,  $\alpha$ -gg-(g+), 'cccc'
- **44.** B3LYP-D3(BJ)/6-311++G(d,p)-optimized geometry of idose,  $\beta$ -gg-(g+), 'cccc'
- **45.** B3LYP-D3(BJ)/6-311++G(d,p)-optimized geometry of mannose,  $\alpha$ -gg-(g+), 'rccc'
- **46.** B3LYP-D3(BJ)/6-311++G(d,p)-optimized geometry of mannose,  $\beta$ -gg-(g+), 'cccc'
- **47.** B3LYP-D3(BJ)/6-311++G(d,p)-optimized geometry of talose,  $\alpha$ -gg-(g+), 'rcrc'
- **48.** B3LYP-D3(BJ)/6-311++G(d,p)-optimized geometry of talose,  $\beta$ -gg-(g+), 'ccrc'

Page S45. **Figure S9.** Comparison of DFTB2, DFTB2-D3H4, and B3LYP geometries.

Page S45. **Table S5.** MAD/RMSD/MAX comparison between DFTB and DFTB-D3 geometries relative to B3LYP geometries.

Page S46. **Figure S10.** Distribution of RMSD of atomic position values for DFTB and DFTB-D3 methods vs. B3LYP geometries.

Page S46. **Figure S11.** Distribution of hydrogen bond distances for B3LYP, DFTB2, DFTB3, DFTB2-D3H4, and DFTB2-D3.

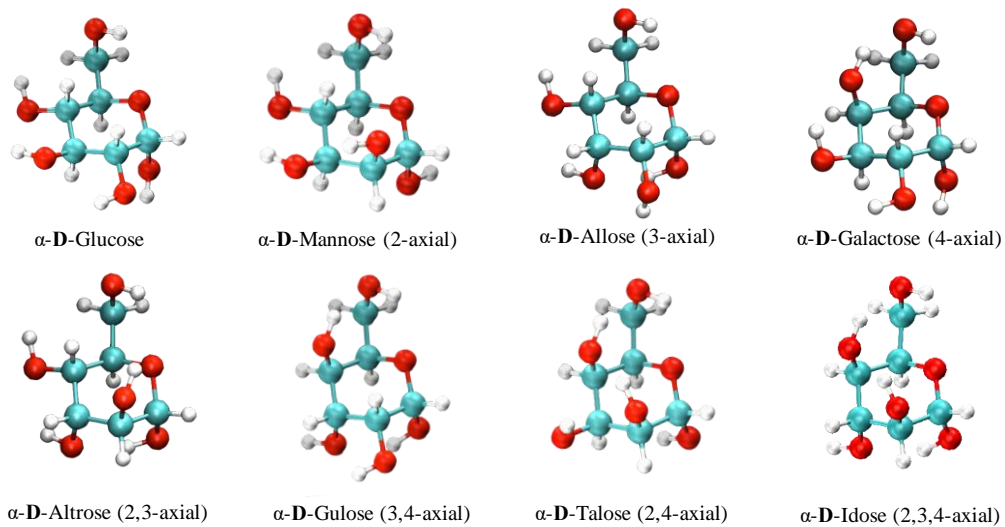

**Figure S1.** The ball and stick representation of  $\alpha$ -D-aldopyranoses based on B3LYP-optimized structures in the gas phase.

**Table S1.** The number of initial structures from ref. 19, optimized at the B3LYP/6-311++G(d,p) level of theory in the gas and aqueous phase.

| Epimer    | Initial vacuum structures |         |       | Initial solvated structures |         |       |
|-----------|---------------------------|---------|-------|-----------------------------|---------|-------|
|           | $\alpha$                  | $\beta$ | Total | $\alpha$                    | $\beta$ | Total |
| Glucose   | 15                        | 15      | 30    | 15                          | 15      | 30    |
| Mannose   | 13                        | 14      | 27    | 12                          | 14      | 26    |
| Allose    | 18                        | 16      | 34    | 18                          | 15      | 33    |
| Galactose | 20                        | 25      | 45    | 10                          | 8       | 18    |
| Altrose   | 22                        | 20      | 42    | 16                          | 26      | 42    |
| Gulose    | 16                        | 16      | 32    | 16                          | 16      | 32    |
| Talose    | 9                         | 9       | 18    | 9                           | 9       | 18    |
| Idose     | 13                        | 14      | 27    | 13                          | 14      | 27    |
| Overall   | 126                       | 129     | 255   | 109                         | 117     | 226   |

**Table S2.** The number of optimized structures retaining the initial B3LYP conformation in both DFTB2 and DFTB3 methods and evaluated in the current work.

| Epimer                  | Optimized vacuum structures |         |       | Optimized solvated structures |         |       |
|-------------------------|-----------------------------|---------|-------|-------------------------------|---------|-------|
|                         | $\alpha$                    | $\beta$ | Total | $\alpha$                      | $\beta$ | Total |
| <i>Heavy Atoms only</i> |                             |         |       |                               |         |       |
| Glucose                 | 12                          | 12      | 24    | 15                            | 14      | 29    |
| Mannose                 | 10                          | 12      | 22    | 12                            | 13      | 25    |
| Allose                  | 16                          | 14      | 30    | 18                            | 14      | 31    |
| Galactose               | 20                          | 25      | 45    | 10                            | 8       | 18    |
| Altrose                 | 19                          | 17      | 36    | 16                            | 25      | 41    |
| Gulose                  | 16                          | 16      | 32    | 16                            | 16      | 32    |
| Talose                  | 9                           | 9       | 18    | 9                             | 9       | 18    |
| Idose                   | 13                          | 14      | 27    | 13                            | 14      | 27    |
| Overall                 | 115                         | 119     | 234   | 109                           | 113     | 221   |
| <i>All Atoms</i>        |                             |         |       |                               |         |       |
| Glucose                 | 11                          | 10      | 21    | 15                            | 7       | 22    |
| Mannose                 | 10                          | 10      | 20    | 12                            | 13      | 25    |
| Allose                  | 8                           | 7       | 15    | 10                            | 4       | 14    |

|           |    |    |     |    |    |     |
|-----------|----|----|-----|----|----|-----|
| Galactose | 19 | 22 | 42  | 10 | 8  | 18  |
| Altrose   | 19 | 11 | 30  | 16 | 13 | 39  |
| Gulose    | 7  | 10 | 17  | 13 | 0  | 13  |
| Talose    | 5  | 3  | 8   | 1  | 6  | 7   |
| Idose     | 8  | 10 | 18  | 12 | 12 | 24  |
| Overall   | 87 | 83 | 170 | 89 | 63 | 152 |

***Ab initio* and first principles single point isomer energies between large and small basis sets.**

Single point energy calculations for both  $\alpha$  and  $\beta$  conformations at B3LYP/6-311++G\*\* geometries have been performed using G3B3, HF/G3Large, MP2/G3Large, QCISD(T,FC)/6-31G(d), B3LYP/6-311++G(d,p), PBE/6-311++G(d,p), B3LYP/STO-3G, and PBE/STO-3G. Single point energies from each level of theory were compared against G3B3 as reference in Figure S1. To differentiate the energies between different methods, we define here  $\Delta\Delta E_{\text{isomer}}$  as the relative isomer energy difference of  $\alpha$  and  $\beta$  conformations relative to the lowest G3B3 energy isomer in both gas phase and water,  $\beta$ -talose, in each method against referenced G3B3 energies. Compared to DFT with large basis set, DFT with a minimal basis set deviates considerably from reference G3B3 energies. The structures studied in this analysis could be found below Figure S2, Structures 1 to 32.



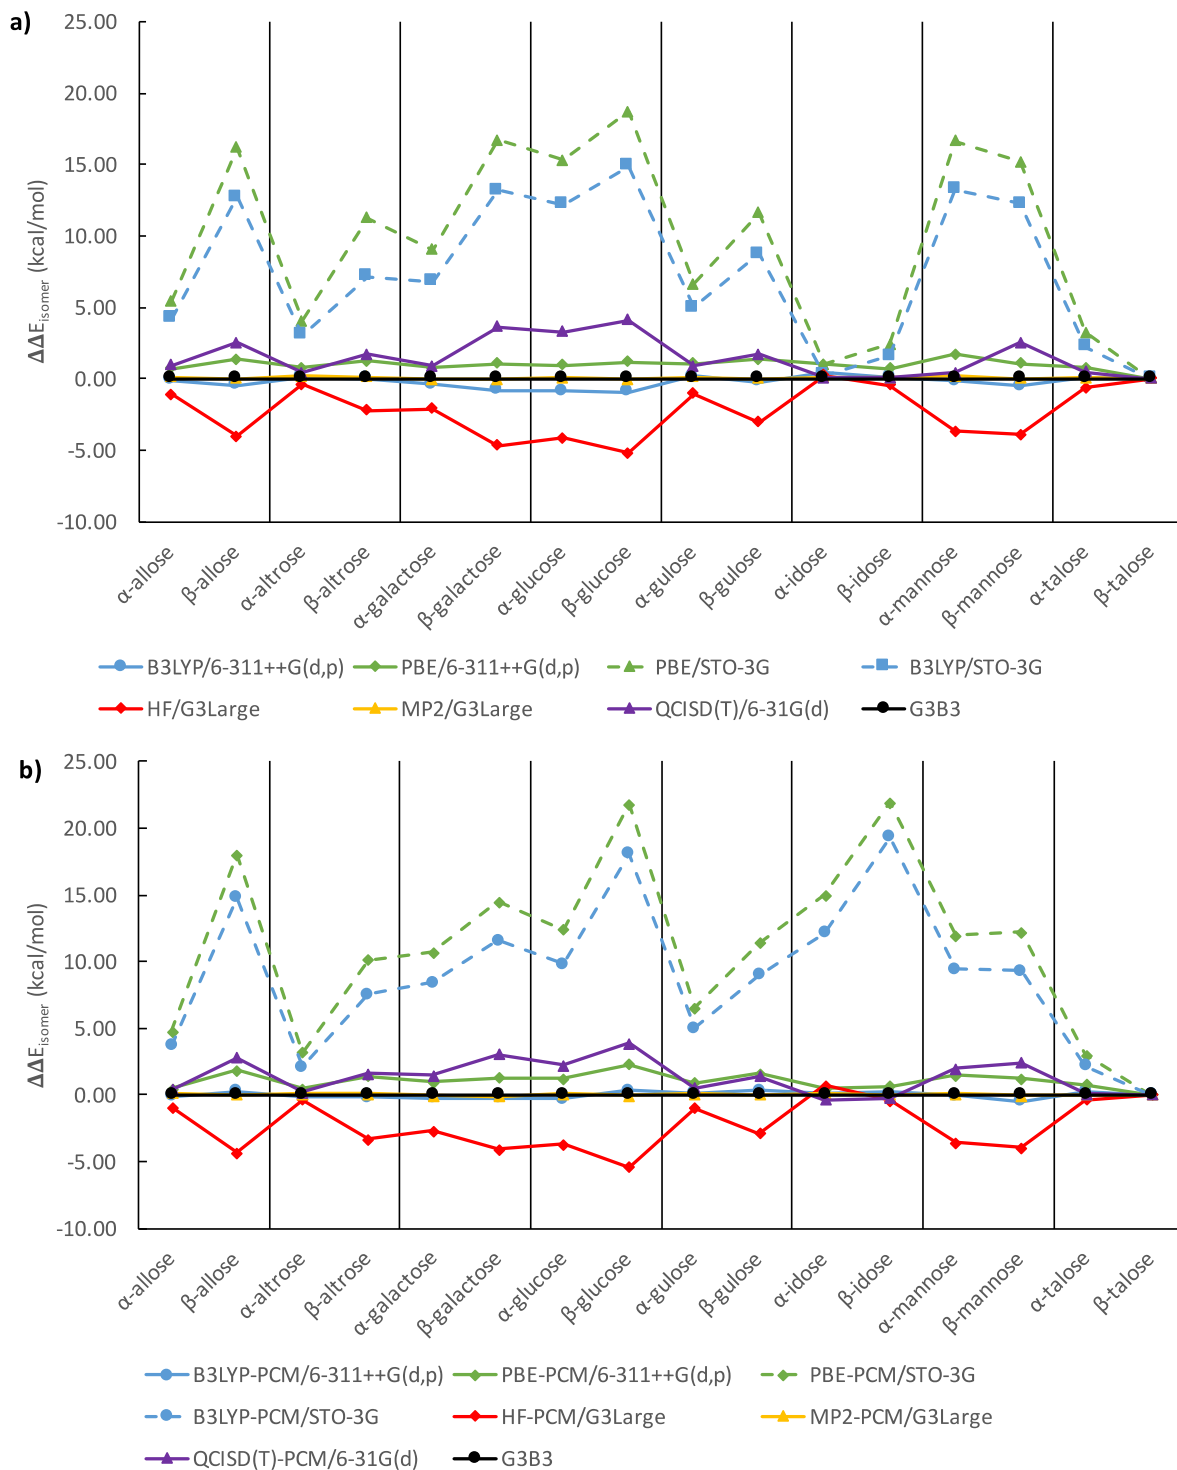

**Figure S2.** Comparison of relative isomer energies relative to the lowest G3B3 energy isomer,  $\beta$ -talose, and relative to G3B3 energies ( $\Delta\Delta E_{\text{isomer}}$ ) in both a) vacuum and b) implicit solvent. Dashed lines represent STO-3G energies.

**Structure 1: B3LYP/6-311++G(d,p)-optimized geometry of allose,  $\alpha$ -tg-(g-), 'cOcc'**

24

Energy: -687.0555034

|   |          |          |          |
|---|----------|----------|----------|
| C | -0.62296 | -0.47902 | -0.78380 |
| C | -0.36702 | 0.99851  | -1.09446 |
| C | 1.11626  | 1.33811  | -0.92781 |
| C | 1.61472  | 0.90909  | 0.46905  |
| C | -0.01647 | -0.86348 | 0.57853  |
| C | -0.04108 | -2.37085 | 0.83299  |
| H | 1.67993  | 0.75873  | -1.66351 |
| H | -0.58283 | -0.35756 | 1.37216  |
| H | -0.14464 | -1.08546 | -1.56657 |
| H | -0.68133 | 1.22088  | -2.12049 |
| H | 2.69873  | 0.99674  | 0.53294  |
| H | 0.44558  | -2.58889 | 1.78709  |
| H | 0.51048  | -2.88690 | 0.04392  |
| H | 0.93867  | 3.24489  | -0.56665 |
| H | -2.01924 | 1.50015  | -0.18453 |
| H | -2.22798 | -1.52659 | -0.42852 |
| H | -1.75707 | -2.85416 | 1.68642  |
| H | 0.15051  | 1.87189  | 1.30142  |
| O | 1.35840  | -0.48865 | 0.63830  |
| O | -2.03797 | -0.65497 | -0.80882 |
| O | -1.10984 | 1.82948  | -0.18451 |
| O | 1.39810  | 2.69498  | -1.21283 |
| O | -1.38402 | -2.88572 | 0.79988  |
| O | 1.08452  | 1.69626  | 1.50032  |

**Structure 2: B3LYP/6-311++G(d,p)-optimized geometry of allose,  $\beta$ -gg-(g+), 'rrrr'**

24

Energy: -687.0552428

|   |          |          |          |
|---|----------|----------|----------|
| C | -1.05192 | -0.51739 | -0.62701 |
| C | -0.88265 | 0.99593  | -0.80755 |
| C | 0.58445  | 1.41248  | -0.72578 |
| C | 1.22691  | 0.84054  | 0.53536  |
| C | -0.26452 | -1.03069 | 0.59800  |
| C | -0.19147 | -2.55169 | 0.66235  |
| H | 1.12998  | 1.00397  | -1.58668 |
| H | -0.73882 | -0.65289 | 1.51466  |
| H | -0.67050 | -1.02957 | -1.51356 |
| H | -1.28805 | 1.29441  | -1.78204 |
| H | -1.20237 | -2.95976 | 0.62918  |
| H | -2.84430 | -0.16996 | 0.02036  |
| H | 0.27661  | -2.84379 | 1.61136  |

|   |          |          |          |
|---|----------|----------|----------|
| H | 1.39226  | -2.70440 | -0.44653 |
| H | 0.74228  | 1.24987  | 1.43361  |
| H | 3.00161  | 0.89025  | 1.32009  |
| H | 1.52484  | 3.11905  | -0.59525 |
| H | -1.49229 | 2.56809  | 0.18128  |
| O | 1.10155  | -0.57283 | 0.53856  |
| O | -2.42619 | -0.85583 | -0.51779 |
| O | -1.64312 | 1.61642  | 0.23527  |
| O | 0.61317  | 2.83684  | -0.73524 |
| O | 2.58551  | 1.17551  | 0.49873  |
| O | 0.51486  | -3.10521 | -0.44044 |

**Structure 3: B3LYP/6-311++G(d,p)-optimized geometry of altrose,  $\alpha$ -tg-(g-), 'crcc'**

24

Energy: -687.0541519

|   |          |          |          |
|---|----------|----------|----------|
| C | 1.27407  | -1.26795 | 0.77427  |
| C | -0.12478 | -1.50998 | 1.36499  |
| C | -1.20837 | -0.99044 | 0.40364  |
| C | -0.94149 | 0.46247  | -0.00991 |
| C | 0.51974  | 0.65605  | -0.45898 |
| C | 0.88961  | 2.12756  | -0.64024 |
| H | 2.04294  | -1.47925 | 1.51833  |
| H | -0.27429 | -2.58045 | 1.52136  |
| H | -2.18500 | -1.05062 | 0.89563  |
| H | -1.13461 | 1.10886  | 0.85784  |
| H | 0.67502  | 0.12575  | -1.40691 |
| H | 1.94687  | 2.21119  | -0.90573 |
| H | 0.72981  | 2.66793  | 0.29567  |
| H | 0.22794  | -0.04358 | 2.59999  |
| H | -1.70862 | -1.39086 | -1.43498 |
| H | -1.60785 | 1.60404  | -1.44317 |
| H | 0.45320  | 2.65868  | -2.49244 |
| H | 0.70516  | -2.20069 | -0.82259 |
| O | -0.23847 | -0.88792 | 2.63872  |
| O | -1.19268 | -1.84251 | -0.75185 |
| O | -1.86678 | 0.75412  | -1.05549 |
| O | 1.41529  | 0.14621  | 0.53285  |
| O | 0.05207  | 2.76063  | -1.62351 |
| O | 1.54160  | -2.03990 | -0.35475 |

**Structure 4: B3LYP/6-311++G(d,p)-optimized geometry of altrose,  $\beta$ -tg-(t), 'cOcc'**

24

Energy: -687.0516986

|   |         |          |         |
|---|---------|----------|---------|
| C | 1.27542 | -1.32555 | 0.48026 |
|---|---------|----------|---------|

|   |          |          |          |
|---|----------|----------|----------|
| C | -0.07145 | -1.60318 | 1.16149  |
| C | -1.23246 | -1.05030 | 0.32390  |
| C | -0.99856 | 0.41297  | -0.09293 |
| C | 0.42321  | 0.59476  | -0.66005 |
| C | 0.80367  | 2.05221  | -0.89708 |
| H | 1.34373  | -1.82990 | -0.48761 |
| H | -0.20690 | -2.67994 | 1.27721  |
| H | -2.15559 | -1.10597 | 0.91450  |
| H | -1.10558 | 1.05911  | 0.79258  |
| H | 0.49902  | 0.04153  | -1.60622 |
| H | 1.81191  | 2.09629  | -1.32062 |
| H | 0.80092  | 2.58820  | 0.05991  |
| H | 0.12895  | -0.11925 | 2.42497  |
| H | -1.90757 | -1.41232 | -1.45022 |
| H | -1.76108 | 1.52973  | -1.49955 |
| H | 0.04215  | 3.54689  | -1.94756 |
| H | 2.12524  | -1.56008 | 2.17707  |
| O | -0.04839 | -1.06656 | 2.48661  |
| O | -1.32839 | -1.87658 | -0.83022 |
| O | -2.01491 | 0.71326  | -1.04368 |
| O | 1.38016  | 0.10095  | 0.27823  |
| O | -0.15929 | 2.61807  | -1.80026 |
| O | 2.34709  | -1.73782 | 1.25186  |

**Structure 5: B3LYP/6-311++G(d,p)-optimized geometry of galactose,  $\alpha$ -gg-(g+), 'cccc'**

24

Energy: -687.0569897

|   |          |          |          |
|---|----------|----------|----------|
| C | -0.44524 | -1.54878 | 0.67829  |
| C | 0.90259  | -0.92902 | 1.07234  |
| C | 0.83708  | 0.60093  | 1.07741  |
| C | 0.29459  | 1.11855  | -0.25607 |
| C | -1.03292 | 0.41175  | -0.57856 |
| C | -1.59101 | 0.73531  | -1.96042 |
| H | -0.33219 | -2.62242 | 0.49615  |
| H | 1.65223  | -1.25271 | 0.34137  |
| H | 0.17615  | 0.92400  | 1.88592  |
| H | 0.09059  | 2.19567  | -0.16496 |
| H | -1.77006 | 0.72889  | 0.17024  |
| H | -1.70311 | 1.81547  | -2.07508 |
| H | -2.57552 | 0.26980  | -2.07054 |
| H | 1.96890  | -0.90895 | 2.70013  |
| H | 2.62448  | 1.14024  | 0.55078  |
| H | 0.92340  | 0.81606  | -2.09472 |
| H | -0.98006 | -1.43453 | 2.52993  |
| H | -0.67878 | -0.65701 | -2.97623 |

|   |          |          |          |
|---|----------|----------|----------|
| O | 1.22260  | -1.42645 | 2.37164  |
| O | 2.12098  | 1.14375  | 1.37727  |
| O | 1.32832  | 0.90838  | -1.21770 |
| O | -0.90216 | -1.01798 | -0.54121 |
| O | -0.71569 | 0.30709  | -3.01151 |
| O | -1.42213 | -1.31976 | 1.67665  |

**Structure 6: B3LYP/6-311++G(d,p)-optimized geometry of galactose,  $\beta$ -gt-(g-), 'rrrr'**

24

Energy: -687.0534685

|   |          |          |          |
|---|----------|----------|----------|
| C | -0.36397 | -0.91276 | -0.80045 |
| C | 1.23151  | -0.38220 | 0.89828  |
| C | 0.51451  | 0.92330  | 1.23474  |
| C | -0.97595 | 0.77764  | 0.94837  |
| C | -1.21667 | 0.32484  | -0.49656 |
| C | -0.38870 | -1.32329 | -2.26765 |
| H | -0.75139 | -1.74704 | -0.19507 |
| H | -1.38802 | 0.02105  | 1.63169  |
| H | -1.36603 | 2.39174  | 1.96575  |
| H | 0.01921  | -0.50988 | -2.87466 |
| H | 1.23185  | -2.38574 | -2.21336 |
| H | -1.42014 | -1.50399 | -2.57761 |
| H | -2.27475 | 0.04055  | -0.59626 |
| H | -1.28533 | 2.17416  | -1.05656 |
| H | 0.94016  | 1.70514  | 0.59544  |
| H | 1.57180  | 1.40260  | 2.80669  |
| H | 0.85530  | -1.20213 | 1.53368  |
| H | 3.06831  | -1.00477 | 0.98330  |
| O | 1.02027  | -0.70726 | -0.46589 |
| O | 2.59708  | -0.17388 | 1.11138  |
| O | 0.63692  | 1.26890  | 2.61249  |
| O | -1.66282 | 2.01313  | 1.12895  |
| O | -0.90310 | 1.36166  | -1.41374 |
| O | 0.31872  | -2.53864 | -2.48153 |

**Structure 7: B3LYP/6-311++G(d,p)-optimized geometry of glucose,  $\alpha$ -gt-(g-), 'rrrr'**

24

Energy: -687.0560768

|   |          |          |          |
|---|----------|----------|----------|
| C | -0.85380 | 0.70940  | -0.39363 |
| C | 0.64096  | 1.02924  | -0.30996 |
| C | 1.30857  | 0.09847  | 0.69689  |
| C | 1.03882  | -1.36740 | 0.34779  |
| C | -0.46536 | -1.61307 | 0.16719  |

|   |          |          |          |
|---|----------|----------|----------|
| C | -1.57242 | 1.49634  | -1.47968 |
| H | -1.32657 | 0.91079  | 0.57340  |
| H | 1.10049  | 0.86422  | -1.29604 |
| H | 0.90035  | 0.31820  | 1.69279  |
| H | 1.54132  | -1.59888 | -0.59478 |
| H | -0.64598 | -2.59332 | -0.28262 |
| H | -1.09139 | 1.29764  | -2.44761 |
| H | -1.48688 | 2.56122  | -1.26386 |
| H | 1.71308  | 2.54362  | 0.26117  |
| H | 3.14596  | -0.25102 | 1.25508  |
| H | 0.99404  | -2.26257 | 2.07028  |
| H | -1.94615 | -1.86084 | 1.42969  |
| H | -3.03755 | 0.24338  | -1.68528 |
| O | -1.03306 | -0.68709 | -0.72975 |
| O | 0.77889  | 2.39159  | 0.07276  |
| O | 2.70626  | 0.38346  | 0.67606  |
| O | 1.60428  | -2.23964 | 1.32045  |
| O | -1.03589 | -1.54649 | 1.46483  |
| O | -2.95960 | 1.19133  | -1.52897 |

**Structure 8: B3LYP/6-311++G(d,p)-optimized geometry of glucose,  $\beta$ -gg-(g+), 'rrrr'**

24

Energy: -687.0545109

|   |          |          |          |
|---|----------|----------|----------|
| C | -1.05249 | 0.61764  | -0.41075 |
| C | 0.39830  | 1.11549  | -0.36448 |
| C | 1.14668  | 0.48583  | 0.80712  |
| C | 1.01008  | -1.03058 | 0.79194  |
| C | -0.46980 | -1.40734 | 0.74142  |
| C | -1.79640 | 1.04079  | -1.67352 |
| H | -1.58859 | 1.01318  | 0.46514  |
| H | 0.90013  | 0.83771  | -1.29939 |
| H | 0.71116  | 0.86414  | 1.74403  |
| H | 1.48950  | -1.43981 | -0.10665 |
| H | -0.98393 | -1.05813 | 1.65209  |
| H | -2.84811 | 0.74107  | -1.57657 |
| H | -1.74848 | 2.12582  | -1.76987 |
| H | 1.26044  | 2.84355  | -0.14330 |
| H | 2.99316  | 0.48210  | 1.43358  |
| H | 1.60565  | -2.48360 | 1.95456  |
| H | -1.20494 | -0.46500 | -2.74416 |
| H | -1.47134 | -3.06589 | 0.66703  |
| O | -1.08531 | -0.82065 | -0.39707 |
| O | -0.54645 | -2.79757 | 0.62580  |
| O | 0.35182  | 2.53209  | -0.23207 |
| O | 2.50679  | 0.89879  | 0.71227  |

|   |          |          |          |
|---|----------|----------|----------|
| O | 1.64429  | -1.52044 | 1.96989  |
| O | -1.21922 | 0.49365  | -2.85034 |

**Structure 9: B3LYP/6-311++G(d,p)-optimized geometry of gulose,  $\alpha$ -gg-(g+), 'rcrc'**

24

Energy: -687.0537183

|   |          |          |          |
|---|----------|----------|----------|
| C | 0.10610  | 1.56463  | 0.49002  |
| C | -1.35388 | 1.09395  | 0.36762  |
| C | -1.45891 | -0.41910 | 0.60395  |
| C | -0.49256 | -1.15500 | -0.34514 |
| C | 0.92934  | -0.58711 | -0.21857 |
| C | 1.93225  | -1.13870 | -1.22611 |
| H | 0.19957  | 2.61102  | 0.19096  |
| H | -1.66079 | 1.29376  | -0.66041 |
| H | -2.47281 | -0.74476 | 0.36427  |
| H | -0.45589 | -2.21087 | -0.03930 |
| H | 1.30186  | -0.84221 | 0.78258  |
| H | 1.96247  | -2.22823 | -1.15853 |
| H | 2.93022  | -0.75102 | -0.99367 |
| H | -2.14052 | 1.48398  | 2.09874  |
| H | -0.46428 | -0.30145 | 2.29422  |
| H | -0.33666 | -1.12626 | -2.29827 |
| H | 1.34776  | 1.84959  | 1.98951  |
| H | 1.60283  | 0.13197  | -2.66786 |
| O | -2.21397 | 1.84158  | 1.20486  |
| O | -1.25230 | -0.76283 | 1.97419  |
| O | -1.04898 | -1.03005 | -1.64832 |
| O | 0.95857  | 0.84690  | -0.38467 |
| O | 0.50647  | 1.40156  | 1.84778  |
| O | 1.58347  | -0.82912 | -2.57926 |

**Structure 10: B3LYP/6-311++G(d,p)-optimized geometry of gulose,  $\beta$ -gg-(g+), 'rrrc'**

24

Energy: -687.0538099

|   |          |          |          |
|---|----------|----------|----------|
| C | 0.18037  | 1.38620  | 0.76756  |
| C | -1.27143 | 0.91746  | 0.60660  |
| C | -1.37552 | -0.60989 | 0.65687  |
| C | -0.40894 | -1.23373 | -0.35533 |
| C | 1.00471  | -0.66686 | -0.13944 |
| C | 2.04215  | -1.14624 | -1.14740 |
| H | 0.54576  | 1.15890  | 1.77521  |
| H | -1.63881 | 1.25847  | -0.36986 |
| H | -2.39800 | -0.90628 | 0.39494  |
| H | -0.36845 | -2.31554 | -0.16354 |

|   |          |          |          |
|---|----------|----------|----------|
| H | 1.33015  | -0.98549 | 0.86063  |
| H | 2.07741  | -2.23768 | -1.15051 |
| H | 3.02917  | -0.76952 | -0.85921 |
| H | -1.91109 | 2.36986  | 1.75128  |
| H | -1.53108 | -0.58864 | 2.59034  |
| H | -0.21629 | -1.00816 | -2.28544 |
| H | 1.79997  | 0.21013  | -2.53008 |
| H | 0.12112  | 2.99778  | -0.29763 |
| O | 0.29001  | 2.77670  | 0.62793  |
| O | -2.08272 | 1.42451  | 1.66459  |
| O | -1.02226 | -1.09854 | 1.94728  |
| O | -0.94333 | -0.96931 | -1.64561 |
| O | 1.00956  | 0.76989  | -0.20885 |
| O | 1.73184  | -0.75148 | -2.48980 |

**Structure 11: B3LYP/6-311++G(d,p)-optimized geometry of idose,  $\alpha$ -gg-(g+), 'cccc'**

24

Energy: -687.0539136

|   |          |          |          |
|---|----------|----------|----------|
| C | 1.38380  | -0.91537 | 0.74676  |
| C | 0.01080  | -1.56185 | 1.03426  |
| C | -0.97696 | -1.28466 | -0.11527 |
| C | -1.02985 | 0.22039  | -0.44225 |
| C | 0.39143  | 0.76405  | -0.66494 |
| C | 0.45838  | 2.27383  | -0.86768 |
| H | 1.99092  | -0.93019 | 1.65089  |
| H | 1.48894  | 2.55813  | -1.10267 |
| H | 0.15858  | -2.64161 | 1.11477  |
| H | -1.97282 | -1.61826 | 0.19383  |
| H | -1.60409 | 0.36827  | -1.37098 |
| H | 0.79218  | 0.28829  | -1.57052 |
| H | -0.18341 | 2.57453  | -1.69888 |
| H | -0.95153 | -0.26981 | 2.11883  |
| H | -1.18582 | -2.02886 | -1.94339 |
| H | -1.43368 | 1.77468  | 0.68251  |
| H | 1.47540  | -1.93886 | -0.90892 |
| H | 0.61249  | 2.81496  | 0.99925  |
| O | -0.51443 | -1.12181 | 2.27261  |
| O | -0.51714 | -2.03731 | -1.25051 |
| O | -1.71035 | 0.84236  | 0.65000  |
| O | 1.23162  | 0.47841  | 0.45299  |
| O | 2.09821  | -1.58984 | -0.25536 |
| O | -0.00802 | 2.99442  | 0.28120  |

**Structure 12: B3LYP/6-311++G(d,p)-optimized geometry of idose,  $\beta$ -gg-(g+), 'cccc'**



24

Energy: -687.0555358

|   |          |          |          |
|---|----------|----------|----------|
| C | 1.44762  | -0.76013 | 0.70067  |
| C | 0.16292  | -1.59588 | 0.86397  |
| C | -0.77021 | -1.44792 | -0.34699 |
| C | -1.00894 | 0.03807  | -0.66930 |
| C | 0.34084  | 0.76165  | -0.80179 |
| C | 0.22106  | 2.26427  | -1.03515 |
| H | 1.21586  | 2.68508  | -1.21294 |
| H | 2.07700  | -1.16378 | -0.09983 |
| H | 0.45243  | -2.64516 | 0.95733  |
| H | -1.72828 | -1.92100 | -0.10531 |
| H | -1.54369 | 0.11565  | -1.62838 |
| H | 0.86615  | 0.32060  | -1.66232 |
| H | -0.40210 | 2.46591  | -1.90938 |
| H | -1.05826 | -0.47037 | 1.88208  |
| H | -0.79389 | -2.30245 | -2.11979 |
| H | -1.68147 | 1.52079  | 0.42352  |
| H | 0.18459  | 2.83082  | 0.82766  |
| H | 1.55152  | -0.70328 | 2.59647  |
| O | 2.18908  | -0.75922 | 1.86762  |
| O | -0.49060 | -1.23493 | 2.07743  |
| O | -0.13483 | -2.10465 | -1.44703 |
| O | -1.82262 | 0.55886  | 0.38684  |
| O | 1.11906  | 0.60790  | 0.38387  |
| O | -0.40668 | 2.92892  | 0.07003  |

**Structure 13: B3LYP/6-311++G(d,p)-optimized geometry of mannose,  $\alpha$ -gg-(g+), 'rccc'**

24

Energy: -687.0546874

|   |          |          |          |
|---|----------|----------|----------|
| C | -0.39689 | -1.52887 | 0.99869  |
| C | 1.07131  | -1.09564 | 1.05364  |
| C | 1.20593  | 0.41522  | 0.84333  |
| C | 0.44235  | 0.85322  | -0.40114 |
| C | -1.02894 | 0.42883  | -0.27479 |
| C | -1.87144 | 0.74715  | -1.50253 |
| H | -0.44614 | -2.61202 | 0.85984  |
| H | -1.91345 | 1.82821  | -1.65075 |
| H | 1.46610  | -1.35717 | 2.04241  |
| H | 0.79023  | 0.93598  | 1.71533  |
| H | 0.87861  | 0.37220  | -1.28034 |
| H | -1.47337 | 0.92575  | 0.59726  |
| H | -2.89420 | 0.39111  | -1.32575 |
| H | 2.62480  | -1.40322 | -0.05567 |
| H | 2.68953  | 1.61131  | 0.45411  |

|   |          |          |          |
|---|----------|----------|----------|
| H | 0.50430  | 2.53632  | -1.41828 |
| H | -1.89288 | -1.46970 | 2.23673  |
| H | -1.25337 | -0.76099 | -2.56042 |
| O | 1.75648  | -1.81619 | 0.03821  |
| O | 2.60101  | 0.68940  | 0.72513  |
| O | 0.58246  | 2.27737  | -0.49469 |
| O | -1.09417 | -1.00172 | -0.11573 |
| O | -0.98990 | -1.13312 | 2.21953  |
| O | -1.33634 | 0.19078  | -2.69678 |

**Structure 14: B3LYP/6-311++G(d,p)-optimized geometry of mannose,  $\beta$ -gg-(g+), 'cccc'**

24

Energy: -687.0542718

|   |          |          |          |
|---|----------|----------|----------|
| C | -0.57090 | -1.43598 | 1.05864  |
| C | 0.91247  | -1.04339 | 1.17086  |
| C | 1.10853  | 0.45827  | 0.96360  |
| C | 0.40041  | 0.93491  | -0.29915 |
| C | -1.08080 | 0.52749  | -0.23282 |
| C | -1.88156 | 0.91372  | -1.47096 |
| H | -1.89933 | 2.00061  | -1.57814 |
| H | -1.12218 | -1.05956 | 1.93050  |
| H | 1.26025  | -1.31794 | 2.17548  |
| H | 0.67650  | 0.99371  | 1.82238  |
| H | 0.85436  | 0.45998  | -1.17288 |
| H | -1.54939 | 1.00374  | 0.64421  |
| H | -2.91420 | 0.56927  | -1.33776 |
| H | 2.51434  | -1.44947 | 0.14609  |
| H | 2.63959  | 1.60624  | 0.62400  |
| H | 0.50610  | 2.64103  | -1.27181 |
| H | -1.28985 | -0.56620 | -2.58170 |
| H | -0.06265 | -3.16675 | 0.43431  |
| O | -0.73136 | -2.81039 | 1.03689  |
| O | 1.61585  | -1.79979 | 0.19189  |
| O | 2.51311  | 0.69171  | 0.90589  |
| O | 0.58004  | 2.35576  | -0.35555 |
| O | -1.16215 | -0.89531 | -0.12804 |
| O | -1.31782 | 0.39449  | -2.66863 |

**Structure 15: B3LYP/6-311++G(d,p)-optimized geometry of talose,  $\alpha$ -gg-(g+), 'rcrc'**

24

Energy: -687.0570870

|   |          |          |         |
|---|----------|----------|---------|
| C | 0.10101  | 1.51292  | 0.94377 |
| C | -1.27198 | 0.82415  | 1.03429 |
| C | -1.10567 | -0.70696 | 1.01587 |

|   |          |          |          |
|---|----------|----------|----------|
| C | -0.27183 | -1.13242 | -0.20304 |
| C | 1.07539  | -0.39099 | -0.17043 |
| C | 1.98421  | -0.67368 | -1.36153 |
| H | -0.03742 | 2.57545  | 0.72922  |
| H | 2.16791  | -1.74730 | -1.44042 |
| H | -1.73678 | 1.12373  | 1.97555  |
| H | -0.55551 | -1.00059 | 1.91381  |
| H | -0.08273 | -2.21294 | -0.14656 |
| H | 1.60557  | -0.70747 | 0.73831  |
| H | 2.94474  | -0.16847 | -1.21279 |
| H | -1.85947 | 0.83197  | -0.81809 |
| H | -2.91855 | -1.01088 | 0.39259  |
| H | -0.42463 | -0.81092 | -2.13527 |
| H | 1.54810  | 1.86104  | 2.19894  |
| H | 1.31182  | 0.68694  | -2.58710 |
| O | -2.13392 | 1.27768  | -0.00014 |
| O | -2.34917 | -1.37672 | 1.08120  |
| O | -1.03560 | -0.83755 | -1.38116 |
| O | 0.88241  | 1.03317  | -0.14590 |
| O | 0.75784  | 1.30974  | 2.17782  |
| O | 1.40017  | -0.27416 | -2.60737 |

**Structure 16: B3LYP/6-311++G(d,p)-optimized geometry of talose,  $\beta$ -gg-(g+), 'ccrc'**

24

Energy: -687.0578393

|   |          |          |          |
|---|----------|----------|----------|
| C | 0.37710  | 1.40276  | 1.07960  |
| C | -1.08633 | 0.91752  | 1.09119  |
| C | -1.16292 | -0.61694 | 1.04879  |
| C | -0.34216 | -1.15578 | -0.13150 |
| C | 1.09308  | -0.60708 | -0.03317 |
| C | 2.00482  | -1.02905 | -1.18268 |
| H | 3.01982  | -0.66593 | -0.99167 |
| H | 0.88826  | 1.12716  | 2.01195  |
| H | -1.55907 | 1.27925  | 2.00797  |
| H | -0.71514 | -1.00542 | 1.97000  |
| H | -0.31605 | -2.25239 | -0.08049 |
| H | 1.53604  | -0.99522 | 0.90005  |
| H | -1.57858 | 1.02139  | -0.78977 |
| H | -2.95867 | -0.67966 | 0.30845  |
| H | -0.36254 | -0.79422 | -2.06275 |
| H | 2.03394  | -2.11824 | -1.25776 |
| H | -0.26102 | 3.03554  | 0.34443  |
| H | 1.60672  | 0.41208  | -2.43330 |
| O | 0.44601  | 2.77711  | 0.95612  |
| O | -1.79960 | 1.52478  | 0.01334  |

|   |          |          |          |
|---|----------|----------|----------|
| O | -2.49529 | -1.09067 | 1.04886  |
| O | -1.00448 | -0.74248 | -1.33498 |
| O | 1.09638  | 0.81865  | -0.02329 |
| O | 1.53530  | -0.55079 | -2.44878 |

**Structure 17: B3LYP-PCM/6-311++G(d,p)-optimized geometry of allose,  $\alpha$ -tg-(g-), 'cOcc'**

24

Energy: -687.0546749

|   |          |          |          |
|---|----------|----------|----------|
| C | -0.60667 | -0.48972 | -0.78694 |
| C | -0.36063 | 0.98753  | -1.09347 |
| C | 1.11745  | 1.33150  | -0.93032 |
| C | 1.62304  | 0.90313  | 0.46152  |
| C | -0.00996 | -0.86733 | 0.57931  |
| C | -0.04366 | -2.37121 | 0.84330  |
| H | 1.68599  | 0.76666  | -1.67010 |
| H | -0.57662 | -0.35466 | 1.36566  |
| H | -0.12503 | -1.09409 | -1.56658 |
| H | -0.68175 | 1.21171  | -2.11494 |
| H | 2.70567  | 0.99925  | 0.51892  |
| H | 0.39750  | -2.58259 | 1.81791  |
| H | 0.52756  | -2.89466 | 0.07502  |
| H | 0.86759  | 3.22994  | -0.57155 |
| H | -1.99890 | 1.46085  | -0.14407 |
| H | -2.20071 | -1.53044 | -0.38464 |
| H | -1.77927 | -2.84092 | 1.65297  |
| H | 0.15166  | 1.85451  | 1.30404  |
| O | 1.37022  | -0.48873 | 0.64269  |
| O | -2.02141 | -0.67487 | -0.81018 |
| O | -1.09811 | 1.81329  | -0.17361 |
| O | 1.38130  | 2.70098  | -1.19461 |
| O | -1.39031 | -2.86960 | 0.77239  |
| O | 1.09240  | 1.69632  | 1.49391  |

**Structure 18: B3LYP-PCM/6-311++G(d,p)-optimized geometry of allose,  $\beta$ -gt-(g-), 'rrrr'**

24

Energy: -687.0525526

|   |          |          |          |
|---|----------|----------|----------|
| C | -0.36734 | 0.95655  | -0.55880 |
| C | 1.49500  | -0.36711 | 0.10078  |
| C | 0.65168  | -1.22576 | 1.03934  |
| C | -0.79901 | -1.27247 | 0.56777  |
| C | -1.35002 | 0.12988  | 0.28904  |
| C | -0.77613 | 2.41396  | -0.65234 |
| H | -0.29868 | 0.52501  | -1.56561 |
| H | 1.51056  | -0.79161 | -0.91035 |

|   |          |          |          |
|---|----------|----------|----------|
| H | 3.39837  | -0.01356 | -0.04305 |
| H | 0.69566  | -0.76430 | 2.03300  |
| H | 2.07132  | -2.54557 | 1.23849  |
| H | -1.41235 | -1.75571 | 1.33530  |
| H | -0.40763 | -2.82076 | -0.55586 |
| H | -1.50784 | 0.64327  | 1.24085  |
| H | -2.56041 | -0.67612 | -0.99096 |
| H | -0.78462 | 2.84357  | 0.35654  |
| H | 0.98665  | 3.04441  | -1.17191 |
| H | -1.77853 | 2.48302  | -1.07249 |
| O | 0.93652  | 0.94224  | 0.05001  |
| O | 2.78045  | -0.29748 | 0.64000  |
| O | 1.11946  | -2.56990 | 1.07924  |
| O | -0.90971 | -2.00197 | -0.65864 |
| O | -2.62141 | 0.04128  | -0.34485 |
| O | 0.08880  | 3.15817  | -1.50618 |

**Structure 19: B3LYP-PCM/6-311++G(d,p)-optimized geometry of altrose,  $\alpha$ -tg-(t), 'crcc'**

24

Energy: -687.0532664

|   |          |          |          |
|---|----------|----------|----------|
| C | 1.28320  | -1.31637 | 0.73078  |
| C | -0.11382 | -1.55404 | 1.32307  |
| C | -1.19415 | -1.02419 | 0.36877  |
| C | -0.92197 | 0.42988  | -0.02599 |
| C | 0.53341  | 0.61837  | -0.49237 |
| C | 0.91213  | 2.08367  | -0.65645 |
| H | 2.04604  | -1.53908 | 1.47454  |
| H | -0.26346 | -2.62317 | 1.47548  |
| H | -2.17285 | -1.08987 | 0.85340  |
| H | -1.09565 | 1.06687  | 0.85070  |
| H | 0.67295  | 0.10352  | -1.44866 |
| H | 1.95354  | 2.15468  | -0.97873 |
| H | 0.79531  | 2.60181  | 0.29978  |
| H | 0.19241  | -0.06436 | 2.54914  |
| H | -1.62689 | -1.36936 | -1.49776 |
| H | -1.53552 | 1.55982  | -1.48367 |
| H | 0.09887  | 3.60373  | -1.62212 |
| H | 0.69922  | -2.22571 | -0.87801 |
| O | -0.21511 | -0.93871 | 2.60181  |
| O | -1.17264 | -1.86220 | -0.79809 |
| O | -1.85192 | 0.74323  | -1.06131 |
| O | 1.44156  | 0.08747  | 0.48290  |
| O | 0.03325  | 2.64355  | -1.64457 |

O 1.53846 -2.09822 -0.40120

**Structure 20: B3LYP-PCM/6-311++G(d,p)-optimized geometry of altrose,  $\beta$ -tg-(t), 'cccc'**

24

Energy: -687.0512083

|   |          |          |          |
|---|----------|----------|----------|
| C | 1.31494  | -1.26248 | 0.45423  |
| C | -0.04117 | -1.57755 | 1.09964  |
| C | -1.20321 | -0.98351 | 0.29927  |
| C | -0.94421 | 0.47773  | -0.08209 |
| C | 0.45450  | 0.64339  | -0.69871 |
| C | 0.82568  | 2.09868  | -0.95037 |
| H | 1.41937  | -1.80373 | -0.49013 |
| H | -0.15832 | -2.66418 | 1.13447  |
| H | -2.11669 | -1.02996 | 0.90444  |
| H | -1.00073 | 1.09345  | 0.82355  |
| H | 0.49722  | 0.08931  | -1.64599 |
| H | 1.83675  | 2.15063  | -1.35965 |
| H | 0.79150  | 2.65089  | -0.00685 |
| H | -0.59731 | -1.52144 | 2.98551  |
| H | -1.89281 | -1.25485 | -1.48367 |
| H | -1.68208 | 1.62883  | -1.47364 |
| H | 0.01923  | 3.57956  | -1.97516 |
| H | 2.09555  | -1.39669 | 2.18456  |
| O | 0.01257  | -1.03480 | 2.42191  |
| O | -1.35380 | -1.77975 | -0.87455 |
| O | -1.97980 | 0.83346  | -1.00099 |
| O | 1.43912  | 0.14252  | 0.20678  |
| O | -0.12861 | 2.63331  | -1.88094 |
| O | 2.36197  | -1.64190 | 1.28518  |

**Structure 21: B3LYP-PCM/6-311++G(d,p)-optimized geometry of galactose,  $\alpha$ -gg-(g-), 'rrrr'**

24

Energy: -687.0542811

|   |          |          |          |
|---|----------|----------|----------|
| C | -1.07499 | 0.60548  | 0.30746  |
| C | -0.44908 | -1.14477 | -1.21798 |
| C | 1.00454  | -1.10437 | -0.73544 |
| C | 1.07563  | -0.61690 | 0.71068  |
| C | 0.34572  | 0.71563  | 0.86624  |
| C | -1.84447 | 1.92260  | 0.32172  |
| H | -1.61946 | -0.09543 | 0.95145  |
| H | -0.49258 | -1.33960 | -2.29027 |
| H | -1.89278 | -2.43922 | -0.95083 |
| H | 0.59551  | -1.35421 | 1.36388  |
| H | 2.94948  | -1.15461 | 0.78970  |

|   |          |          |          |
|---|----------|----------|----------|
| H | -1.88103 | 2.27236  | 1.36072  |
| H | -0.35162 | 2.93005  | -0.40455 |
| H | -2.86417 | 1.73591  | -0.01514 |
| H | 0.27864  | 0.96367  | 1.93215  |
| H | 1.98751  | 1.66677  | 0.40297  |
| H | 1.55853  | -0.41358 | -1.37085 |
| H | 1.01872  | -3.03526 | -0.54041 |
| O | -1.08234 | 0.10293  | -1.04069 |
| O | -1.07979 | -2.18990 | -0.49747 |
| O | 1.63846  | -2.37238 | -0.87615 |
| O | 2.42845  | -0.40938 | 1.11529  |
| O | 1.05121  | 1.75660  | 0.17977  |
| O | -1.31220 | 2.92964  | -0.53308 |

**Structure 22: B3LYP-PCM/6-311++G(d,p)-optimized geometry of galactose,  $\beta$ -gg-(g-), 'rrrr'**

24

Energy: -687.0526425

|   |          |          |          |
|---|----------|----------|----------|
| C | -0.26881 | -1.03869 | -0.78373 |
| C | 1.26938  | -0.52814 | 0.96562  |
| C | 0.55370  | 0.78084  | 1.28977  |
| C | -0.92415 | 0.66116  | 0.94468  |
| C | -1.11627 | 0.20882  | -0.50203 |
| C | -0.31064 | -1.49577 | -2.23894 |
| H | -0.69428 | -1.85382 | -0.17979 |
| H | -1.37580 | -0.08734 | 1.60770  |
| H | -1.31882 | 2.28776  | 1.94087  |
| H | -1.35732 | -1.69919 | -2.49730 |
| H | -0.04720 | 0.30155  | -2.92263 |
| H | 0.24902  | -2.42714 | -2.32722 |
| H | -2.17099 | -0.04807 | -0.65430 |
| H | -1.13990 | 2.07255  | -1.08185 |
| H | 1.01304  | 1.57068  | 0.68586  |
| H | 1.54886  | 1.30137  | 2.88432  |
| H | 0.86695  | -1.34997 | 1.57524  |
| H | 3.06356  | -1.19775 | 1.26287  |
| O | 1.10090  | -0.83880 | -0.41391 |
| O | 2.62817  | -0.33913 | 1.21926  |
| O | 0.62845  | 1.10483  | 2.67494  |
| O | -1.59458 | 1.91061  | 1.09585  |
| O | -0.74385 | 1.25298  | -1.40705 |
| O | 0.27433  | -0.58142 | -3.15918 |

**Structure 23: B3LYP-PCM/6-311++G(d,p)-optimized geometry of glucose,  $\alpha$ -tg-(g+), 'rrrr'**

24

Energy: -687.0533324

|   |          |          |          |
|---|----------|----------|----------|
| C | -0.94888 | 0.54265  | -0.47421 |
| C | 0.54640  | 0.85938  | -0.36140 |
| C | 1.19020  | -0.02979 | 0.69074  |
| C | 0.91594  | -1.50289 | 0.38105  |
| C | -0.58454 | -1.74341 | 0.17346  |
| C | -1.64169 | 1.32379  | -1.58896 |
| H | -1.43756 | 0.76825  | 0.47942  |
| H | 1.02744  | 0.67123  | -1.32997 |
| H | 0.76447  | 0.22298  | 1.66945  |
| H | 1.43776  | -1.77114 | -0.53916 |
| H | -0.76306 | -2.73763 | -0.23686 |
| H | -2.65991 | 0.95062  | -1.70057 |
| H | -1.11044 | 1.15683  | -2.53366 |
| H | 1.61650  | 2.44212  | 0.07841  |
| H | 3.00285  | -0.33157 | 1.34101  |
| H | 0.82273  | -2.31484 | 2.14063  |
| H | -2.05680 | -2.03497 | 1.42857  |
| H | -0.86302 | 2.99924  | -0.98423 |
| O | -1.11475 | -0.84908 | -0.78727 |
| O | 0.67707  | 2.24420  | -0.02257 |
| O | 2.58929  | 0.24832  | 0.69007  |
| O | 1.44360  | -2.34637 | 1.39919  |
| O | -1.19371 | -1.60602 | 1.44133  |
| O | -1.73717 | 2.71334  | -1.29002 |

**Structure 24: B3LYP-PCM/6-311++G(d,p)-optimized geometry of glucose,  $\beta$ -gg-(g+), 'rrrr'**

24

Energy: -687.0517072

|   |          |          |          |
|---|----------|----------|----------|
| C | -1.04757 | 0.60383  | -0.41745 |
| C | 0.40564  | 1.08880  | -0.38565 |
| C | 1.13943  | 0.47409  | 0.79902  |
| C | 0.99545  | -1.03996 | 0.79882  |
| C | -0.48212 | -1.42328 | 0.71973  |
| C | -1.81022 | 1.06636  | -1.64923 |
| H | -1.56897 | 0.97357  | 0.47600  |
| H | 0.89901  | 0.77568  | -1.31276 |
| H | 0.70094  | 0.86424  | 1.72714  |
| H | 1.49442  | -1.46208 | -0.08184 |
| H | -1.02250 | -1.07631 | 1.61131  |
| H | -2.84227 | 0.71153  | -1.57490 |
| H | -1.80334 | 2.15411  | -1.68496 |
| H | 1.30631  | 2.79199  | -0.14973 |
| H | 2.96723  | 0.50972  | 1.47398  |
| H | 1.56742  | -2.48569 | 1.97443  |



|   |          |          |          |
|---|----------|----------|----------|
| H | -1.18560 | -0.35481 | -2.81718 |
| H | -1.43466 | -3.10971 | 0.83376  |
| O | -1.07055 | -0.83233 | -0.43839 |
| O | -0.54892 | -2.81019 | 0.60005  |
| O | 0.39439  | 2.51070  | -0.29390 |
| O | 2.50439  | 0.87988  | 0.71298  |
| O | 1.60028  | -1.52207 | 1.99412  |
| O | -1.20866 | 0.60863  | -2.85820 |

**Structure 25: B3LYP-PCM/6-311++G(d,p)-optimized geometry of gulose,  $\alpha$ -gg-(g+), 'rcrc'**

24

Energy: -687.0533920

|   |          |          |          |
|---|----------|----------|----------|
| C | 0.08838  | 1.56288  | 0.49867  |
| C | -1.36651 | 1.08709  | 0.37139  |
| C | -1.46556 | -0.42699 | 0.59874  |
| C | -0.49414 | -1.15122 | -0.34877 |
| C | 0.92182  | -0.57585 | -0.21892 |
| C | 1.92336  | -1.13798 | -1.21663 |
| H | 0.18256  | 2.61148  | 0.21510  |
| H | -1.68157 | 1.29506  | -0.65057 |
| H | -2.47787 | -0.75532 | 0.35935  |
| H | -0.45286 | -2.20812 | -0.05585 |
| H | 1.29394  | -0.82214 | 0.78244  |
| H | 1.97590  | -2.22099 | -1.10583 |
| H | 2.91029  | -0.71416 | -1.02146 |
| H | -2.05257 | 1.54759  | 2.13008  |
| H | -0.46444 | -0.31763 | 2.28811  |
| H | -0.29703 | -1.04213 | -2.28920 |
| H | 1.30280  | 1.83671  | 2.02534  |
| H | 1.68285  | 0.04927  | -2.75769 |
| O | -2.23249 | 1.82165  | 1.22183  |
| O | -1.25282 | -0.78070 | 1.96620  |
| O | -1.03944 | -1.02271 | -1.66167 |
| O | 0.93300  | 0.85644  | -0.39149 |
| O | 0.47365  | 1.37538  | 1.85302  |
| O | 1.54383  | -0.88886 | -2.58063 |

**Structure 26: B3LYP-PCM/6-311++G(d,p)-optimized geometry of gulose,  $\beta$ -gg-(g+), 'Orrc'**

24

Energy: -687.0514990

|   |          |          |          |
|---|----------|----------|----------|
| C | 0.19626  | 1.37761  | 0.78142  |
| C | -1.25744 | 0.92765  | 0.60967  |
| C | -1.37614 | -0.59728 | 0.64746  |
| C | -0.40274 | -1.23261 | -0.34784 |

|   |          |          |          |
|---|----------|----------|----------|
| C | 1.00990  | -0.66182 | -0.14464 |
| C | 2.03835  | -1.15040 | -1.15402 |
| H | 0.56367  | 1.11311  | 1.77812  |
| H | -1.61222 | 1.28294  | -0.36504 |
| H | -2.39817 | -0.87715 | 0.36931  |
| H | -0.35911 | -2.30932 | -0.14103 |
| H | 1.34425  | -0.97293 | 0.85348  |
| H | 2.10599  | -2.23747 | -1.10932 |
| H | 3.01269  | -0.72350 | -0.90992 |
| H | -1.89390 | 2.37521  | 1.76073  |
| H | -1.52227 | -0.53369 | 2.58025  |
| H | -0.17444 | -0.99131 | -2.26604 |
| H | 1.81370  | 0.13039  | -2.61831 |
| H | 0.04096  | 3.03734  | -0.20357 |
| O | 0.32007  | 2.76743  | 0.68201  |
| O | -2.07064 | 1.43109  | 1.66729  |
| O | -1.05952 | -1.09586 | 1.94493  |
| O | -0.92763 | -0.99455 | -1.65155 |
| O | 1.00843  | 0.77490  | -0.21778 |
| O | 1.68310  | -0.81893 | -2.50774 |

**Structure 27: B3LYP-PCM/6-311++G(d,p)-optimized geometry of idose  $\alpha$ -gg-(g+), 'cccc'**

24

Energy: -687.0548006

|   |          |          |          |
|---|----------|----------|----------|
| C | 1.37659  | -0.93117 | 0.74465  |
| C | 0.00442  | -1.57198 | 1.03924  |
| C | -0.97946 | -1.29928 | -0.10986 |
| C | -1.03295 | 0.20588  | -0.42537 |
| C | 0.38161  | 0.74845  | -0.66655 |
| C | 0.44371  | 2.25356  | -0.87857 |
| H | 1.98827  | -0.95527 | 1.64408  |
| H | 1.47457  | 2.54185  | -1.09308 |
| H | 0.15000  | -2.64936 | 1.13050  |
| H | -1.97692 | -1.63767 | 0.18395  |
| H | -1.62303 | 0.36603  | -1.33701 |
| H | 0.76941  | 0.27131  | -1.57430 |
| H | -0.18551 | 2.53730  | -1.72198 |
| H | -0.95349 | -0.26100 | 2.10183  |
| H | -1.09148 | -1.92674 | -1.98586 |
| H | -1.39064 | 1.75462  | 0.71958  |
| H | 1.43916  | -1.91397 | -0.93399 |
| H | 0.58702  | 2.87668  | 0.97195  |
| O | -0.51338 | -1.11035 | 2.27773  |
| O | -0.49781 | -2.04437 | -1.23506 |
| O | -1.68475 | 0.82563  | 0.69277  |

|   |          |          |          |
|---|----------|----------|----------|
| O | 1.24089  | 0.45707  | 0.44512  |
| O | 2.07698  | -1.62233 | -0.26273 |
| O | -0.05134 | 2.98378  | 0.25619  |

**Structure 28: B3LYP-PCM/6-311++G(d,p)-optimized geometry of idose  $\beta$ -gg-(g+), 'cccc'**

24

Energy: -687.0550078

|   |          |          |          |
|---|----------|----------|----------|
| C | 1.44191  | -0.77758 | 0.69038  |
| C | 0.16086  | -1.61264 | 0.86211  |
| C | -0.77563 | -1.46395 | -0.34238 |
| C | -1.01115 | 0.02225  | -0.65506 |
| C | 0.33325  | 0.74546  | -0.80488 |
| C | 0.20515  | 2.24236  | -1.04815 |
| H | 1.19475  | 2.67625  | -1.20769 |
| H | 2.06848  | -1.18966 | -0.10590 |
| H | 0.45188  | -2.66000 | 0.95793  |
| H | -1.73459 | -1.93298 | -0.10256 |
| H | -1.56514 | 0.11025  | -1.59841 |
| H | 0.84967  | 0.30485  | -1.66760 |
| H | -0.40501 | 2.42113  | -1.93347 |
| H | -1.04065 | -0.46632 | 1.87406  |
| H | -0.76450 | -2.17910 | -2.17069 |
| H | -1.64040 | 1.50530  | 0.45841  |
| H | 0.14081  | 2.88792  | 0.79769  |
| H | 1.53772  | -0.72680 | 2.59000  |
| O | 2.18244  | -0.77880 | 1.86655  |
| O | -0.48664 | -1.24128 | 2.07858  |
| O | -0.14257 | -2.12393 | -1.43660 |
| O | -1.79875 | 0.54417  | 0.42645  |
| O | 1.12734  | 0.58785  | 0.37800  |
| O | -0.45638 | 2.91061  | 0.03970  |

**Structure 29: B3LYP-PCM/6-311++G(d,p)-optimized geometry of mannose,  $\alpha$ -tg-(g+), 'rrrr'**

24

Energy: -687.0519085

|   |          |          |          |
|---|----------|----------|----------|
| C | -0.89791 | -1.30901 | 1.00284  |
| C | 0.60898  | -1.17059 | 1.27241  |
| C | 1.10016  | 0.23500  | 0.92240  |
| C | 0.63334  | 0.61964  | -0.48031 |
| C | -0.88946 | 0.49768  | -0.58616 |
| C | -1.42043 | 0.79592  | -1.98688 |
| H | -1.18279 | -2.36351 | 1.00414  |
| H | -2.48460 | 0.56125  | -2.01627 |
| H | 0.79320  | -1.37323 | 2.32978  |

|   |          |          |          |
|---|----------|----------|----------|
| H | 0.69184  | 0.95012  | 1.63901  |
| H | 1.08942  | -0.05845 | -1.21208 |
| H | -1.35953 | 1.18147  | 0.12930  |
| H | -0.90344 | 0.15784  | -2.71305 |
| H | 1.37608  | -2.93984 | 0.86485  |
| H | 2.87416  | -0.49386 | 0.65250  |
| H | 1.94624  | 2.05818  | -0.63667 |
| H | -2.50590 | -0.77938 | 1.95224  |
| H | -0.38573 | 2.43799  | -2.08779 |
| O | 1.35899  | -2.06974 | 0.45295  |
| O | 2.51921  | 0.32803  | 1.02161  |
| O | 0.99616  | 1.97051  | -0.78517 |
| O | -1.26363 | -0.85615 | -0.28871 |
| O | -1.56157 | -0.59616 | 2.02264  |
| O | -1.28600 | 2.17281  | -2.33049 |

**Structure 30: B3LYP-PCM/6-311++G(d,p)-optimized geometry of mannose,  $\beta$ -tg-(t), 'cccc'**

24

Energy: -687.0520000

|   |          |          |          |
|---|----------|----------|----------|
| C | -0.70678 | -1.42651 | 1.12295  |
| C | 0.80232  | -1.18337 | 1.25424  |
| C | 1.13840  | 0.27616  | 0.97870  |
| C | 0.52652  | 0.76186  | -0.32789 |
| C | -0.98156 | 0.46224  | -0.33443 |
| C | -1.64749 | 0.77279  | -1.66963 |
| H | -1.24112 | -0.93154 | 1.94069  |
| H | 1.10040  | -1.43624 | 2.27780  |
| H | 0.72166  | 0.88730  | 1.79028  |
| H | 0.99310  | 0.23127  | -1.16723 |
| H | -1.46302 | 1.04707  | 0.46228  |
| H | -2.71859 | 0.57286  | -1.59447 |
| H | -1.21354 | 0.12840  | -2.43955 |
| H | 2.37839  | -1.83743 | 0.31170  |
| H | 2.77161  | 1.25951  | 0.59053  |
| H | 0.26990  | 2.52267  | -1.11963 |
| H | -1.74649 | 2.34050  | -2.85802 |
| H | -0.34598 | -3.24136 | 0.64653  |
| O | -1.00341 | -2.78283 | 1.19006  |
| O | 1.43982  | -2.06250 | 0.33102  |
| O | 2.56083  | 0.39571  | 0.96712  |
| O | 0.81261  | 2.15792  | -0.40188 |
| O | -1.20050 | -0.93413 | -0.12610 |
| O | -1.40949 | 2.15426  | -1.97606 |

**Structure 31: B3LYP-PCM/6-311++G(d,p)-optimized geometry of talose,  $\alpha$ -gg-(g+), 'rcrc'**

24

Energy: -687.0562701

|   |          |          |          |
|---|----------|----------|----------|
| C | 0.10393  | 1.51265  | 0.95995  |
| C | -1.27057 | 0.83092  | 1.04653  |
| C | -1.10633 | -0.69784 | 1.02675  |
| C | -0.27275 | -1.12439 | -0.18689 |
| C | 1.06861  | -0.37605 | -0.16643 |
| C | 1.96781  | -0.67559 | -1.35588 |
| H | -0.02421 | 2.58062  | 0.77704  |
| H | 2.16640  | -1.74608 | -1.39917 |
| H | -1.74157 | 1.13740  | 1.98088  |
| H | -0.56822 | -0.99999 | 1.92688  |
| H | -0.07561 | -2.20083 | -0.13059 |
| H | 1.60532  | -0.67923 | 0.74013  |
| H | 2.91210  | -0.14134 | -1.23716 |
| H | -1.83181 | 0.82478  | -0.81209 |
| H | -2.89148 | -1.03435 | 0.33821  |
| H | -0.41504 | -0.76673 | -2.11010 |
| H | 1.54980  | 1.83008  | 2.22031  |
| H | 1.34353  | 0.63547  | -2.66894 |
| O | -2.12358 | 1.27883  | -0.00291 |
| O | -2.36153 | -1.36204 | 1.07584  |
| O | -1.04243 | -0.83617 | -1.36842 |
| O | 0.86157  | 1.04716  | -0.14940 |
| O | 0.76502  | 1.27109  | 2.18182  |
| O | 1.35631  | -0.32755 | -2.60982 |

**Structure 32: B3LYP-PCM/6-311++G(d,p)-optimized geometry of talose,  $\beta$ -gg-(g+), 'ccOc'**

24

Energy: -687.0574016

|   |          |          |          |
|---|----------|----------|----------|
| C | 0.37364  | 1.39107  | 1.09842  |
| C | -1.08977 | 0.91552  | 1.10390  |
| C | -1.16515 | -0.61606 | 1.05444  |
| C | -0.34568 | -1.14963 | -0.12378 |
| C | 1.08836  | -0.60384 | -0.02729 |
| C | 1.99176  | -1.02857 | -1.17758 |
| H | 2.99307  | -0.62503 | -1.01692 |
| H | 0.88108  | 1.10655  | 2.02720  |
| H | -1.56244 | 1.27514  | 2.01895  |
| H | -0.72791 | -1.00831 | 1.97600  |
| H | -0.31533 | -2.24362 | -0.07888 |
| H | 1.53331  | -0.98678 | 0.90247  |
| H | -1.56781 | 1.02065  | -0.78085 |
| H | -2.93709 | -0.71704 | 0.25341  |
| H | -0.35344 | -0.75354 | -2.04558 |

|   |          |          |          |
|---|----------|----------|----------|
| H | 2.05156  | -2.11651 | -1.22074 |
| H | -0.26907 | 3.02997  | 0.37338  |
| H | 1.59841  | 0.35926  | -2.49980 |
| O | 0.43886  | 2.77359  | 0.98538  |
| O | -1.79079 | 1.53053  | 0.01931  |
| O | -2.50565 | -1.08363 | 1.03549  |
| O | -1.01109 | -0.72862 | -1.32735 |
| O | 1.08600  | 0.82765  | -0.01233 |
| O | 1.48543  | -0.59797 | -2.45148 |

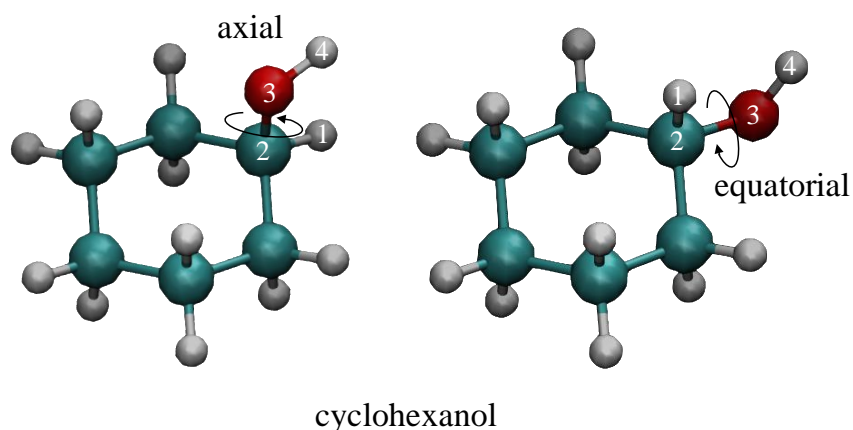

**Figure S3.** The ball and stick representation of cyclohexanol and their indicated direction of rotation. Initial angle is determined by the C-C-O-H dihedral angle (numbered 1, 2, 3, 4) when the hydroxyl and the hydrogen on 2 are eclipsed and set at  $0^\circ$  as reference.

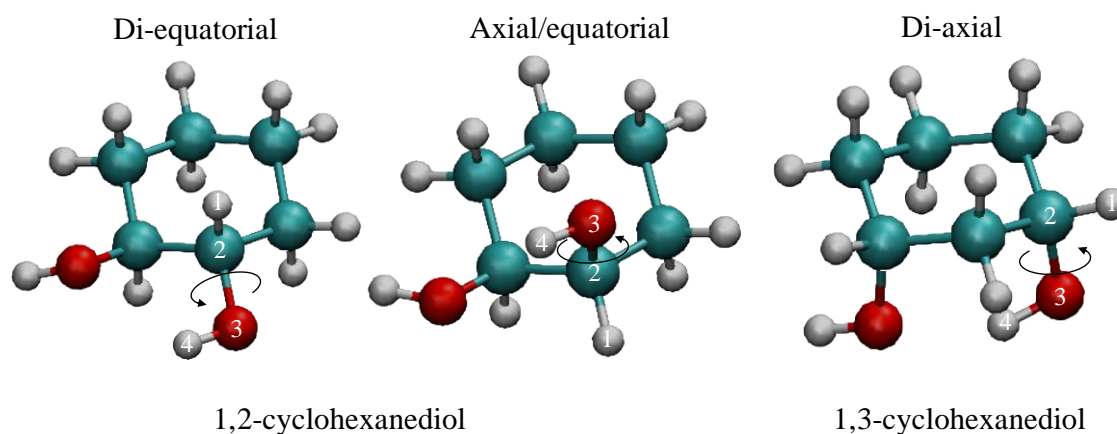

**Figure S4.** The ball and stick representation of 1,2- and 1,3-cyclohexanediol, their indicated direction of rotation, and type of hydrogen bond interaction. Initial angle is determined by the C-C-O-H dihedral angle (numbered 1, 2, 3, 4) from optimized B3LYP geometries and set at  $0^\circ$  as reference.

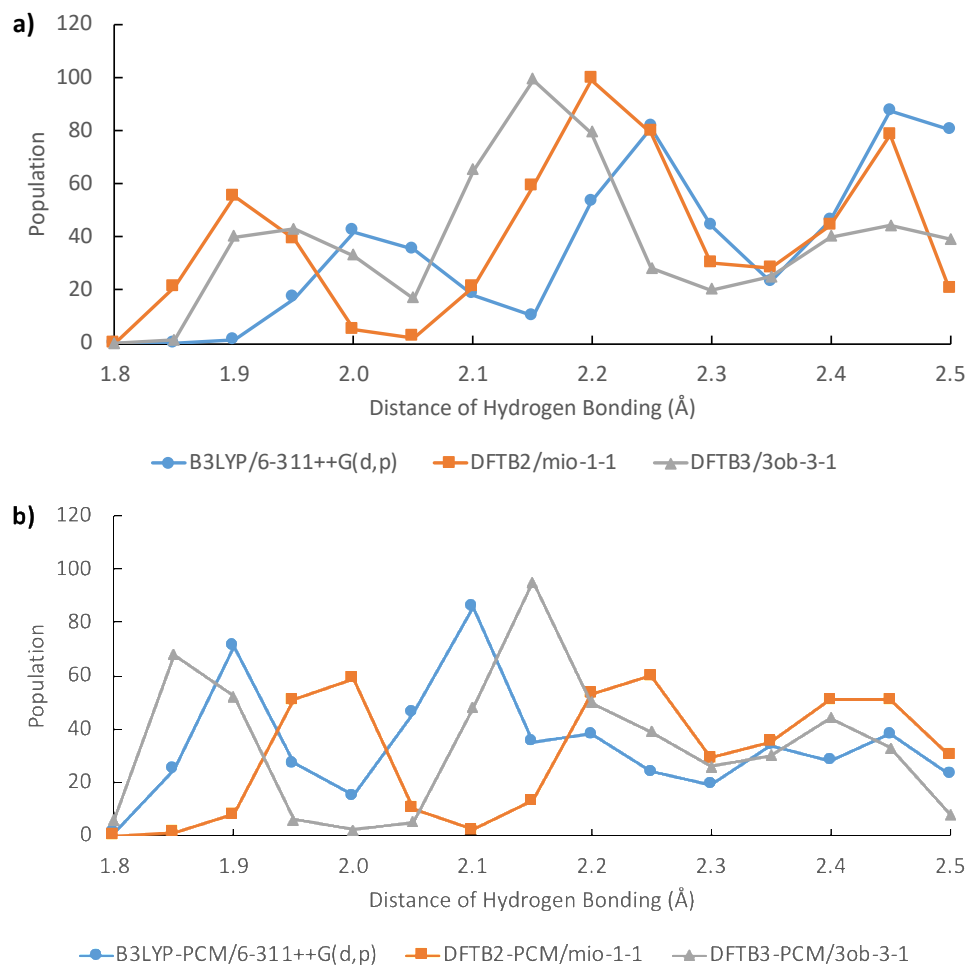

**Figure S5.** Distribution of hydrogen bonding distances in a) vacuum and in b) implicit solvent.

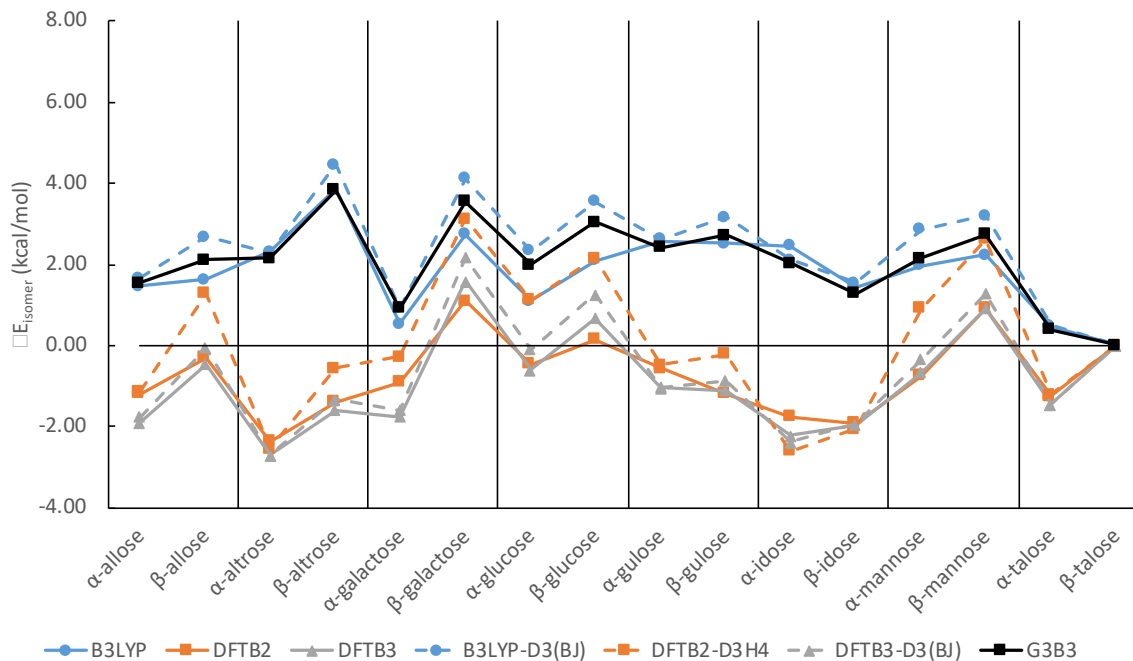

**Figure S6.** Comparison of  $\Delta E_{\text{isomer}}$  between DFT, DFT-D3, DFTB and DFTB-D3 vs. G3B3 energies from B3LYP/6-311++G(d,p) geometries.

**Table S3.** The mean absolute deviation, root-mean square deviation, mean signed deviation, and the maximum deviation of  $\Delta E_{\text{isomer}}$  (kcal/mol) for B3LYP and B3LYP-D3(BJ) versus G3B3 energies. See explanation of  $\Delta E_{\text{isomer}}$  in text from Figure S2.

|      | Method |              |
|------|--------|--------------|
|      | B3LYP  | B3LYP-D3(BJ) |
| MAD  | 0.34   | 0.32         |
| RMSD | 0.46   | 0.39         |
| MSD  | -0.22  | 0.32         |
| MAX  | 0.95   | 0.71         |



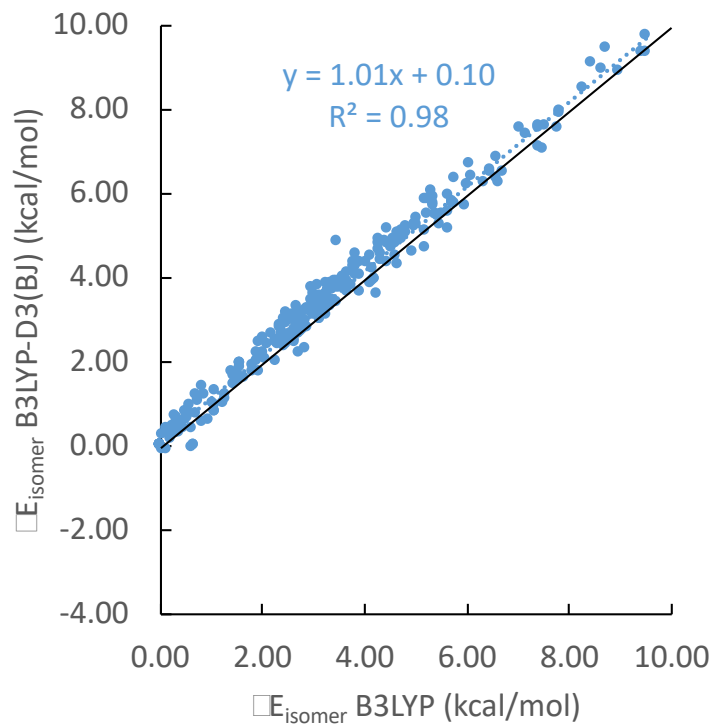

**Figure S7.** Comparison of  $\delta E_{\text{isomer}}$  between B3LYP and B3LYP-D3(BJ) energies from B3LYP/6-311++G(d,p) geometries.

**Table S4.** The mean absolute deviation, root-mean square deviation, mean signed deviation, and the maximum deviation of  $\delta E_{\text{isomer}}$  (kcal/mol) for B3LYP versus B3LYP-D3(BJ) energies.

|      | Method |
|------|--------|
|      | B3LYP  |
| MAD  | 0.26   |
| RMSD | 0.33   |
| MSD  | 0.15   |
| MAX  | 1.38   |

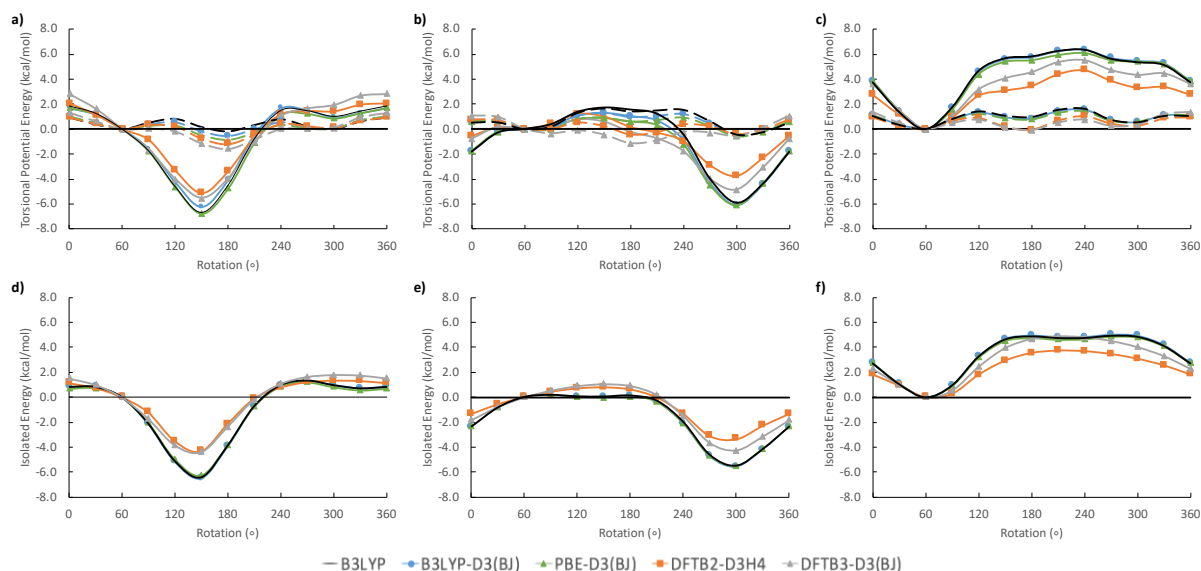

**Figure S8.** Torsional potential energy versus degree of rotation plots for 1,2- and 1,3-cyclohexanediol in vacuum. (From left to right) The energies of axial-axial, axial-equatorial, and equatorial-equatorial hydrogen bond interactions, respectively. (Top, a-c) The solid line represents the energy of a two hydroxyl group system and the dashed line represents the energy of a single hydroxyl group system. (Bottom, d-f) Isolated hydrogen bond energy.

**Structure 33: B3LYP/6-311++G(d,p)-optimized geometry of allose,  $\alpha$ -tg-(g-), 'cOcc'**

24

Energy: -687.0967802

|   |          |          |          |
|---|----------|----------|----------|
| C | -1.04886 | -0.51835 | -0.62687 |
| C | -0.88159 | 0.99170  | -0.80678 |
| C | 0.58372  | 1.40462  | -0.72937 |
| C | 1.22163  | 0.83839  | 0.53377  |
| C | -0.26615 | -1.02624 | 0.59961  |
| C | -0.19615 | -2.54463 | 0.66045  |
| H | 1.12834  | 0.99059  | -1.58760 |
| H | -0.74067 | -0.64320 | 1.51312  |
| H | -0.66401 | -1.03177 | -1.51045 |
| H | -1.29169 | 1.29261  | -1.77794 |
| H | -1.20715 | -2.95090 | 0.62132  |
| H | -2.83680 | -0.17442 | 0.02611  |
| H | 0.27022  | -2.84121 | 1.60854  |
| H | 1.38292  | -2.66859 | -0.45373 |
| H | 0.73031  | 1.24846  | 1.42756  |
| H | 2.99157  | 0.89331  | 1.32445  |
| H | 1.52556  | 3.10641  | -0.58476 |
| H | -1.46959 | 2.55962  | 0.19634  |
| O | 1.10003  | -0.57329 | 0.54024  |

|   |          |          |          |
|---|----------|----------|----------|
| O | -2.42188 | -0.85806 | -0.51706 |
| O | -1.63350 | 1.60987  | 0.24249  |
| O | 0.61554  | 2.82798  | -0.74142 |
| O | 2.57838  | 1.17802  | 0.50168  |
| O | 0.51413  | -3.08784 | -0.44447 |

**Structure 34: B3LYP-D3(BJ)/6-311++G(d,p)-optimized geometry of allose,  $\beta$ -gg-(g+), 'rrrr'**

24

Energy: -687.0951546

|   |          |          |          |
|---|----------|----------|----------|
| C | -1.04886 | -0.51835 | -0.62687 |
| C | -0.88159 | 0.99170  | -0.80678 |
| C | 0.58372  | 1.40462  | -0.72937 |
| C | 1.22163  | 0.83839  | 0.53377  |
| C | -0.26615 | -1.02624 | 0.59961  |
| C | -0.19615 | -2.54463 | 0.66045  |
| H | 1.12834  | 0.99059  | -1.58760 |
| H | -0.74067 | -0.64320 | 1.51312  |
| H | -0.66401 | -1.03177 | -1.51045 |
| H | -1.29169 | 1.29261  | -1.77794 |
| H | -1.20715 | -2.95090 | 0.62132  |
| H | -2.83680 | -0.17442 | 0.02611  |
| H | 0.27022  | -2.84121 | 1.60854  |
| H | 1.38292  | -2.66859 | -0.45373 |
| H | 0.73031  | 1.24846  | 1.42756  |
| H | 2.99157  | 0.89331  | 1.32445  |
| H | 1.52556  | 3.10641  | -0.58476 |
| H | -1.46959 | 2.55962  | 0.19634  |
| O | 1.10003  | -0.57329 | 0.54024  |
| O | -2.42188 | -0.85806 | -0.51706 |
| O | -1.63350 | 1.60987  | 0.24249  |
| O | 0.61554  | 2.82798  | -0.74142 |
| O | 2.57838  | 1.17802  | 0.50168  |
| O | 0.51413  | -3.08784 | -0.44447 |

**Structure 35: B3LYP-D3(BJ)/6-311++G(d,p)-optimized geometry of altrose,  $\alpha$ -tg-(g-), 'crrc'**

24

Energy: -687.0958093

|   |          |          |          |
|---|----------|----------|----------|
| C | 1.27207  | -1.26985 | 0.77233  |
| C | -0.12478 | -1.50836 | 1.36399  |
| C | -1.20601 | -0.99213 | 0.40243  |
| C | -0.93887 | 0.45916  | -0.00470 |
| C | 0.52005  | 0.65118  | -0.45181 |
| C | 0.88372  | 2.12111  | -0.63312 |
| H | 2.04141  | -1.48793 | 1.51313  |

|   |          |          |          |
|---|----------|----------|----------|
| H | -0.27466 | -2.57702 | 1.52851  |
| H | -2.18341 | -1.05514 | 0.89130  |
| H | -1.13123 | 1.10342  | 0.86398  |
| H | 0.67564  | 0.11911  | -1.39815 |
| H | 1.94201  | 2.20990  | -0.89143 |
| H | 0.71275  | 2.66137  | 0.30042  |
| H | 0.23046  | -0.02850 | 2.57431  |
| H | -1.68694 | -1.37065 | -1.44243 |
| H | -1.59318 | 1.60173  | -1.43896 |
| H | 0.44312  | 2.61886  | -2.49114 |
| H | 0.69031  | -2.18576 | -0.82596 |
| O | -0.23593 | -0.87202 | 2.62973  |
| O | -1.18581 | -1.83644 | -0.75768 |
| O | -1.85982 | 0.75380  | -1.05189 |
| O | 1.41463  | 0.14493  | 0.53993  |
| O | 0.04883  | 2.74685  | -1.62255 |
| O | 1.53137  | -2.03268 | -0.36313 |

**Structure 36: B3LYP-D3(BJ)/6-311++G(d,p)-optimized geometry of altrose,  $\beta$ -tg-(t), 'cOcc'**

24

Energy: -687.0923077

|   |          |          |          |
|---|----------|----------|----------|
| C | 1.26905  | -1.33095 | 0.47701  |
| C | -0.07453 | -1.59662 | 1.16451  |
| C | -1.23096 | -1.05208 | 0.32088  |
| C | -0.99773 | 0.40922  | -0.08968 |
| C | 0.42133  | 0.58904  | -0.65714 |
| C | 0.79781  | 2.04576  | -0.88681 |
| H | 1.32881  | -1.83477 | -0.49092 |
| H | -0.21116 | -2.67057 | 1.29848  |
| H | -2.15893 | -1.11291 | 0.90219  |
| H | -1.10294 | 1.05322  | 0.79686  |
| H | 0.49410  | 0.03814  | -1.60417 |
| H | 1.80664  | 2.09563  | -1.30722 |
| H | 0.78929  | 2.57497  | 0.07360  |
| H | 0.15397  | -0.09164 | 2.38800  |
| H | -1.88085 | -1.40550 | -1.46166 |
| H | -1.75144 | 1.52723  | -1.49622 |
| H | 0.02485  | 3.54471  | -1.92113 |
| H | 2.12293  | -1.56082 | 2.16996  |
| O | -0.04607 | -1.03236 | 2.47663  |
| O | -1.31030 | -1.87370 | -0.83687 |
| O | -2.01105 | 0.71213  | -1.04121 |
| O | 1.38019  | 0.09409  | 0.27633  |
| O | -0.16544 | 2.61157  | -1.78872 |

O 2.34009 -1.74820 1.24564

**Structure 37: B3LYP-D3(BJ)/6-311++G(d,p)-optimized geometry of galactose,  $\alpha$ -gg-(g+),**

'cccc'

24

Energy: -687.0979678

|   |          |          |          |
|---|----------|----------|----------|
| C | -0.44608 | -1.54438 | 0.67238  |
| C | 0.90154  | -0.92768 | 1.06059  |
| C | 0.82985  | 0.59926  | 1.07833  |
| C | 0.29021  | 1.11943  | -0.25144 |
| C | -1.03536 | 0.41553  | -0.57451 |
| C | -1.58377 | 0.73979  | -1.95746 |
| H | -0.33745 | -2.61827 | 0.49225  |
| H | 1.64646  | -1.24220 | 0.32169  |
| H | 0.16613  | 0.91387  | 1.88719  |
| H | 0.08726  | 2.19616  | -0.16051 |
| H | -1.77194 | 0.72896  | 0.17516  |
| H | -1.67605 | 1.82039  | -2.08111 |
| H | -2.57405 | 0.28810  | -2.06991 |
| H | 1.96858  | -0.90160 | 2.68354  |
| H | 2.61490  | 1.13807  | 0.55501  |
| H | 0.91522  | 0.79893  | -2.08613 |
| H | -0.96661 | -1.41282 | 2.52418  |
| H | -0.66474 | -0.67609 | -2.92540 |
| O | 1.23067  | -1.43048 | 2.35434  |
| O | 2.11185  | 1.14223  | 1.38170  |
| O | 1.32295  | 0.90674  | -1.21209 |
| O | -0.90448 | -1.01320 | -0.54480 |
| O | -0.70669 | 0.28609  | -2.99561 |
| O | -1.41659 | -1.30746 | 1.67398  |

**Structure 38: B3LYP-D3(BJ)/6-311++G(d,p)-optimized geometry of galactose,  $\beta$ -gt-(g-),**

'rrrr'

24

Energy: -687.0928537

|   |          |          |          |
|---|----------|----------|----------|
| C | -0.36706 | -0.91337 | -0.79706 |
| C | 1.22590  | -0.38317 | 0.89461  |
| C | 0.51137  | 0.92179  | 1.22659  |
| C | -0.97739 | 0.77258  | 0.94773  |
| C | -1.21581 | 0.32378  | -0.49564 |
| C | -0.39346 | -1.32140 | -2.26193 |

|   |          |          |          |
|---|----------|----------|----------|
| H | -0.75285 | -1.74567 | -0.18882 |
| H | -1.38504 | 0.01363  | 1.63024  |
| H | -1.35021 | 2.39055  | 1.96007  |
| H | 0.00596  | -0.50247 | -2.86684 |
| H | 1.23272  | -2.36797 | -2.18770 |
| H | -1.42379 | -1.51085 | -2.56909 |
| H | -2.27388 | 0.04360  | -0.60107 |
| H | -1.26184 | 2.17499  | -1.04142 |
| H | 0.93239  | 1.69917  | 0.57959  |
| H | 1.57736  | 1.39622  | 2.79068  |
| H | 0.84524  | -1.20101 | 1.52953  |
| H | 3.06039  | -1.00705 | 0.98161  |
| O | 1.01704  | -0.70840 | -0.46789 |
| O | 2.59028  | -0.17601 | 1.11116  |
| O | 0.64018  | 1.27413  | 2.60076  |
| O | -1.66338 | 2.00697  | 1.13165  |
| O | -0.89142 | 1.36095  | -1.40713 |
| O | 0.32693  | -2.52833 | -2.47594 |

**Structure 39: B3LYP-D3(BJ)/6-311++G(d,p)-optimized geometry of glucose,  $\alpha$ -gt-(g-),**

'rrrr'

24

Energy: -687.0957090

|   |          |          |          |
|---|----------|----------|----------|
| C | -0.85216 | 0.70670  | -0.39070 |
| C | 0.63980  | 1.02502  | -0.31062 |
| C | 1.30309  | 0.09709  | 0.69683  |
| C | 1.03681  | -1.36507 | 0.34181  |
| C | -0.46559 | -1.60903 | 0.16513  |
| C | -1.56969 | 1.49704  | -1.47081 |
| H | -1.32128 | 0.90246  | 0.57859  |
| H | 1.09729  | 0.85571  | -1.29646 |
| H | 0.88739  | 0.31300  | 1.68993  |
| H | 1.53778  | -1.59185 | -0.60208 |
| H | -0.64955 | -2.59144 | -0.27726 |
| H | -1.08284 | 1.30752  | -2.43745 |
| H | -1.49122 | 2.56031  | -1.24642 |
| H | 1.71185  | 2.53332  | 0.26815  |
| H | 3.13550  | -0.26168 | 1.25526  |
| H | 0.99399  | -2.25544 | 2.06357  |
| H | -1.94565 | -1.83041 | 1.43101  |
| H | -3.01855 | 0.22865  | -1.66935 |
| O | -1.03245 | -0.68644 | -0.73345 |
| O | 0.77917  | 2.38691  | 0.06898  |

|   |          |          |          |
|---|----------|----------|----------|
| O | 2.69948  | 0.38252  | 0.68449  |
| O | 1.60251  | -2.23817 | 1.31232  |
| O | -1.03079 | -1.53025 | 1.46378  |
| O | -2.95327 | 1.17966  | -1.52588 |

**Structure 40: B3LYP-D3(BJ)/6-311++G(d,p)-optimized geometry of glucose,  $\beta$ -gg-(g+),**

'rrrr'

24

Energy: -687.0937521

|   |          |          |          |
|---|----------|----------|----------|
| C | -1.05415 | 0.61830  | -0.40581 |
| C | 0.39495  | 1.11286  | -0.36391 |
| C | 1.14090  | 0.48639  | 0.80653  |
| C | 1.00764  | -1.02719 | 0.78268  |
| C | -0.47026 | -1.40242 | 0.74043  |
| C | -1.78962 | 1.04161  | -1.67018 |
| H | -1.58765 | 1.01349  | 0.47094  |
| H | 0.89382  | 0.82952  | -1.29823 |
| H | 0.70080  | 0.85972  | 1.74289  |
| H | 1.48005  | -1.42922 | -0.12243 |
| H | -0.97855 | -1.04887 | 1.65231  |
| H | -2.84278 | 0.74632  | -1.57922 |
| H | -1.73413 | 2.12558  | -1.77017 |
| H | 1.25957  | 2.83586  | -0.13652 |
| H | 2.98574  | 0.47267  | 1.42986  |
| H | 1.59483  | -2.48611 | 1.93770  |
| H | -1.17643 | -0.47205 | -2.71174 |
| H | -1.47291 | -3.05843 | 0.67043  |
| O | -1.08977 | -0.81860 | -0.39510 |
| O | -0.54767 | -2.79213 | 0.62904  |
| O | 0.35076  | 2.52874  | -0.23617 |
| O | 2.49921  | 0.90227  | 0.71648  |
| O | 1.64834  | -1.52380 | 1.95272  |
| O | -1.20426 | 0.48402  | -2.83758 |

**Structure 41: B3LYP-D3(BJ)/6-311++G(d,p)-optimized geometry of gulose,  $\alpha$ -gg-(g+),**

'rerc'

24

Energy: -687.0952666

|   |          |         |         |
|---|----------|---------|---------|
| C | 0.10461  | 1.55944 | 0.48289 |
| C | -1.35302 | 1.08909 | 0.36101 |

|   |          |          |          |
|---|----------|----------|----------|
| C | -1.45675 | -0.42047 | 0.60449  |
| C | -0.49362 | -1.15510 | -0.34332 |
| C | 0.92587  | -0.59045 | -0.21239 |
| C | 1.92420  | -1.14401 | -1.21948 |
| H | 0.19790  | 2.60538  | 0.18418  |
| H | -1.65976 | 1.28375  | -0.66745 |
| H | -2.47111 | -0.74746 | 0.37098  |
| H | -0.45788 | -2.21144 | -0.04088 |
| H | 1.29410  | -0.84096 | 0.79057  |
| H | 1.93980  | -2.23413 | -1.16512 |
| H | 2.92586  | -0.76993 | -0.98227 |
| H | -2.13022 | 1.48093  | 2.09234  |
| H | -0.45251 | -0.28776 | 2.28373  |
| H | -0.32791 | -1.10700 | -2.29279 |
| H | 1.35319  | 1.82815  | 1.97721  |
| H | 1.58461  | 0.15265  | -2.63065 |
| O | -2.20997 | 1.83797  | 1.19883  |
| O | -1.24032 | -0.75646 | 1.97395  |
| O | -1.04519 | -1.02335 | -1.64661 |
| O | 0.95772  | 0.84110  | -0.38752 |
| O | 0.50334  | 1.39549  | 1.84063  |
| O | 1.57709  | -0.81074 | -2.56688 |

**Structure 42: B3LYP-D3(BJ)/6-311++G(d,p)-optimized geometry of gulose,  $\beta$ -gg-(g+),**

'rrrc'

24

Energy: -687.0944012

|   |          |          |          |
|---|----------|----------|----------|
| C | 0.17964  | 1.37751  | 0.76395  |
| C | -1.26967 | 0.91126  | 0.59733  |
| C | -1.37242 | -0.61270 | 0.65829  |
| C | -0.40976 | -1.23552 | -0.35367 |
| C | 1.00227  | -0.67359 | -0.13389 |
| C | 2.03301  | -1.15216 | -1.14526 |
| H | 0.53981  | 1.14804  | 1.77239  |
| H | -1.63101 | 1.24560  | -0.38308 |
| H | -2.39533 | -0.91301 | 0.40491  |
| H | -0.37089 | -2.31795 | -0.16806 |
| H | 1.32445  | -0.99097 | 0.86672  |
| H | 2.05305  | -2.24333 | -1.16664 |
| H | 3.02456  | -0.79141 | -0.85342 |
| H | -1.89449 | 2.36773  | 1.74021  |
| H | -1.50981 | -0.56893 | 2.58997  |
| H | -0.20913 | -0.98727 | -2.27788 |



|   |          |          |          |
|---|----------|----------|----------|
| H | 1.77273  | 0.23543  | -2.48751 |
| H | 0.11127  | 2.98688  | -0.29927 |
| O | 0.28859  | 2.76724  | 0.62494  |
| O | -2.08219 | 1.42591  | 1.64946  |
| O | -1.00853 | -1.08909 | 1.94942  |
| O | -0.94031 | -0.96066 | -1.64211 |
| O | 1.01119  | 0.76156  | -0.20795 |
| O | 1.72211  | -0.72826 | -2.47805 |

**Structure 43: B3LYP-D3(BJ)/6-311++G(d,p)-optimized geometry of idose,  $\alpha$ -gg-(g+), 'cccc'**

24

Energy: -687.0961018

|   |          |          |          |
|---|----------|----------|----------|
| C | 1.38117  | -0.91065 | 0.74498  |
| C | 0.01045  | -1.55418 | 1.03664  |
| C | -0.97374 | -1.28586 | -0.11485 |
| C | -1.02890 | 0.21525  | -0.44551 |
| C | 0.38923  | 0.75854  | -0.66853 |
| C | 0.44946  | 2.26685  | -0.86661 |
| H | 1.99141  | -0.92603 | 1.64637  |
| H | 1.47453  | 2.55565  | -1.11814 |
| H | 0.15790  | -2.63281 | 1.12639  |
| H | -1.96899 | -1.62181 | 0.19195  |
| H | -1.60196 | 0.36059  | -1.37491 |
| H | 0.79338  | 0.28037  | -1.57027 |
| H | -0.21051 | 2.57245  | -1.68106 |
| H | -0.95372 | -0.25009 | 2.09900  |
| H | -1.15902 | -2.00467 | -1.95336 |
| H | -1.41928 | 1.76932  | 0.68128  |
| H | 1.45685  | -1.92709 | -0.91118 |
| H | 0.62076  | 2.74562  | 1.01042  |
| O | -0.51590 | -1.09918 | 2.26766  |
| O | -0.50670 | -2.03821 | -1.24604 |
| O | -1.70859 | 0.84078  | 0.64369  |
| O | 1.22623  | 0.48170  | 0.45226  |
| O | 2.08750  | -1.58279 | -0.26240 |
| O | 0.00517  | 2.97064  | 0.30048  |

**Structure 44: B3LYP-D3(BJ)/6-311++G(d,p)-optimized geometry of idose,  $\beta$ -gg-(g+), 'cccc'**

24

Energy: -687.0969777

|   |         |          |         |
|---|---------|----------|---------|
| C | 1.44362 | -0.75843 | 0.69654 |
| C | 0.15949 | -1.58971 | 0.86422 |

|   |          |          |          |
|---|----------|----------|----------|
| C | -0.76907 | -1.44764 | -0.34715 |
| C | -1.00970 | 0.03482  | -0.66989 |
| C | 0.33767  | 0.75557  | -0.80697 |
| C | 0.21178  | 2.25587  | -1.03491 |
| H | 1.20145  | 2.68063  | -1.22909 |
| H | 2.07044  | -1.16460 | -0.10390 |
| H | 0.44706  | -2.63826 | 0.96573  |
| H | -1.72578 | -1.92473 | -0.10966 |
| H | -1.54636 | 0.11246  | -1.62746 |
| H | 0.86176  | 0.31273  | -1.66620 |
| H | -0.43057 | 2.46009  | -1.89395 |
| H | -1.05820 | -0.45084 | 1.86451  |
| H | -0.77146 | -2.26798 | -2.13391 |
| H | -1.66293 | 1.51898  | 0.42872  |
| H | 0.20122  | 2.77370  | 0.83863  |
| H | 1.54097  | -0.69484 | 2.58924  |
| O | 2.18256  | -0.75469 | 1.86415  |
| O | -0.49406 | -1.21515 | 2.07206  |
| O | -0.12372 | -2.09998 | -1.44253 |
| O | -1.81799 | 0.55909  | 0.38709  |
| O | 1.11616  | 0.60765  | 0.37744  |
| O | -0.39416 | 2.90812  | 0.08937  |

**Structure 45: B3LYP-D3(BJ)/6-311++G(d,p)-optimized geometry of mannose,  $\alpha$ -gg-(g+),**

'rccc'

24

Energy: -687.0948824

|   |          |          |          |
|---|----------|----------|----------|
| C | -0.39825 | -1.52686 | 0.99904  |
| C | 1.06892  | -1.09815 | 1.04435  |
| C | 1.20019  | 0.41206  | 0.84728  |
| C | 0.43830  | 0.84788  | -0.39486 |
| C | -1.03039 | 0.42620  | -0.26809 |
| C | -1.86156 | 0.74491  | -1.50000 |
| H | -0.45315 | -2.61027 | 0.86804  |
| H | -1.89910 | 1.82544  | -1.65103 |
| H | 1.47338  | -1.37015 | 2.02583  |
| H | 0.78177  | 0.92626  | 1.72104  |
| H | 0.87333  | 0.36280  | -1.27172 |
| H | -1.47442 | 0.92147  | 0.60414  |
| H | -2.88593 | 0.38985  | -1.33299 |
| H | 2.60546  | -1.38388 | -0.08930 |
| H | 2.67541  | 1.60880  | 0.44254  |
| H | 0.48639  | 2.52448  | -1.41692 |

|   |          |          |          |
|---|----------|----------|----------|
| H | -1.88903 | -1.44224 | 2.23892  |
| H | -1.20867 | -0.76477 | -2.52844 |
| O | 1.74205  | -1.80494 | 0.01273  |
| O | 2.59336  | 0.69058  | 0.72753  |
| O | 0.57848  | 2.27020  | -0.49349 |
| O | -1.09752 | -1.00336 | -0.11375 |
| O | -0.98211 | -1.11723 | 2.21877  |
| O | -1.31121 | 0.18230  | -2.68375 |

**Structure 46: B3LYP-D3(BJ)/6-311++G(d,p)-optimized geometry of mannose,  $\beta$ -gg-(g+),**

'cccc'

24

Energy: -687.0943346

|   |          |          |          |
|---|----------|----------|----------|
| C | -0.57178 | -1.43408 | 1.05919  |
| C | 0.90952  | -1.04186 | 1.16568  |
| C | 1.10346  | 0.45822  | 0.96595  |
| C | 0.39744  | 0.92841  | -0.29616 |
| C | -1.08166 | 0.52664  | -0.22535 |
| C | -1.87347 | 0.91429  | -1.46534 |
| H | -1.88749 | 2.00074  | -1.57395 |
| H | -1.11972 | -1.05723 | 1.93244  |
| H | 1.26394  | -1.32404 | 2.16524  |
| H | 0.66945  | 0.99150  | 1.82437  |
| H | 0.84783  | 0.44383  | -1.16573 |
| H | -1.54731 | 1.00248  | 0.65263  |
| H | -2.90699 | 0.57051  | -1.34046 |
| H | 2.49863  | -1.42475 | 0.11791  |
| H | 2.62902  | 1.60327  | 0.60709  |
| H | 0.48984  | 2.62333  | -1.28217 |
| H | -1.25124 | -0.56823 | -2.55064 |
| H | -0.06208 | -3.15944 | 0.42889  |
| O | -0.72901 | -2.80825 | 1.03636  |
| O | 1.60588  | -1.78769 | 0.17474  |
| O | 2.50668  | 0.69362  | 0.90587  |
| O | 0.58056  | 2.34662  | -0.36494 |
| O | -1.16653 | -0.89471 | -0.12435 |
| O | -1.29707 | 0.39024  | -2.65439 |

**Structure 47: B3LYP-D3(BJ)/6-311++G(d,p)-optimized geometry of talose,  $\alpha$ -gg-(g+), 'rcrc'**

24

Energy: -687.0986630

|   |          |          |          |
|---|----------|----------|----------|
| C | 0.10223  | 1.51047  | 0.93973  |
| C | -1.26992 | 0.82618  | 1.02586  |
| C | -1.10294 | -0.70265 | 1.01951  |
| C | -0.26889 | -1.13339 | -0.19387 |
| C | 1.07488  | -0.39186 | -0.16484 |
| C | 1.97427  | -0.67496 | -1.35982 |
| H | -0.03155 | 2.57398  | 0.72970  |
| H | 2.14214  | -1.74957 | -1.45285 |
| H | -1.74128 | 1.13218  | 1.96122  |
| H | -0.55447 | -0.98969 | 1.91985  |
| H | -0.07826 | -2.21273 | -0.13241 |
| H | 1.60568  | -0.70217 | 0.74458  |
| H | 2.94126  | -0.18254 | -1.21251 |
| H | -1.83964 | 0.81007  | -0.82815 |
| H | -2.90846 | -1.00786 | 0.38564  |
| H | -0.41463 | -0.80458 | -2.12385 |
| H | 1.55336  | 1.83839  | 2.19295  |
| H | 1.27655  | 0.70787  | -2.53888 |
| O | -2.12034 | 1.27054  | -0.02024 |
| O | -2.34668 | -1.37023 | 1.08219  |
| O | -1.03049 | -0.84483 | -1.37411 |
| O | 0.88083  | 1.03103  | -0.15000 |
| O | 0.75731  | 1.29590  | 2.17179  |
| O | 1.38301  | -0.25037 | -2.59325 |

**Structure 48: B3LYP-D3(BJ)/6-311++G(d,p)-optimized geometry of talose,  $\beta$ -gg-(g+), 'ccrc'**

24

Energy: -687.0994385

|   |          |          |          |
|---|----------|----------|----------|
| C | 0.37886  | 1.39885  | 1.07565  |
| C | -1.08230 | 0.91503  | 1.08700  |
| C | -1.16041 | -0.61682 | 1.05090  |
| C | -0.34169 | -1.15745 | -0.12629 |
| C | 1.09115  | -0.61133 | -0.02812 |
| C | 1.99464  | -1.03183 | -1.18143 |
| H | 3.01471  | -0.68479 | -0.98948 |
| H | 0.88994  | 1.12412  | 2.00774  |
| H | -1.55744 | 1.28194  | 1.99979  |
| H | -0.71355 | -1.00315 | 1.97286  |
| H | -0.31655 | -2.25344 | -0.07540 |
| H | 1.53377  | -0.99613 | 0.90567  |
| H | -1.56216 | 1.00316  | -0.79443 |
| H | -2.95096 | -0.66924 | 0.30627  |
| H | -0.35136 | -0.78064 | -2.05276 |
| H | 2.00649  | -2.11951 | -1.27390 |

|   |          |          |          |
|---|----------|----------|----------|
| H | -0.26348 | 3.02331  | 0.33409  |
| H | 1.57676  | 0.43949  | -2.38272 |
| O | 0.44539  | 2.77203  | 0.94677  |
| O | -1.78893 | 1.51520  | 0.00200  |
| O | -2.49343 | -1.08579 | 1.04715  |
| O | -1.00058 | -0.74311 | -1.33032 |
| O | 1.09602  | 0.81305  | -0.02537 |
| O | 1.52409  | -0.52360 | -2.43501 |

### First principles geometries vs. DFTB-D3 optimized geometries.

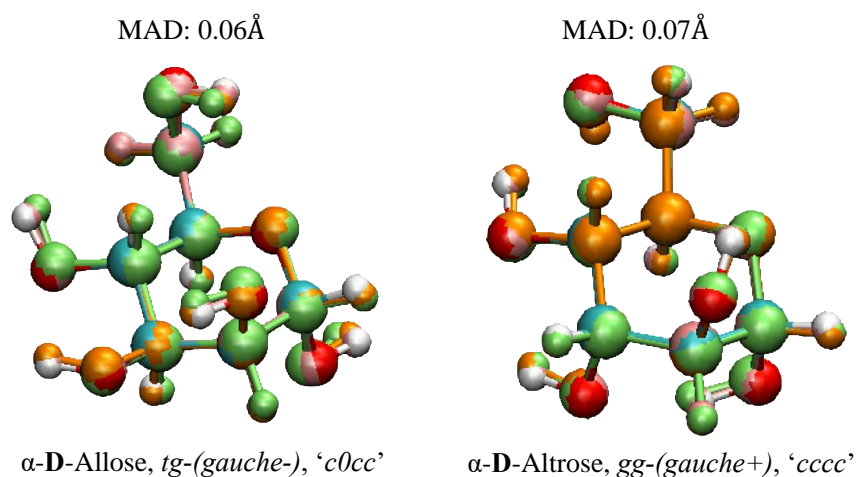

**Figure S9.** Comparisons of optimized structures including hydrogen atoms between optimized B3LYP (red, cyan, and white), B3LYP-D3(BJ) (pink), DFTB2 (orange), and DFTB2-D3H4 (lime) structures.

The geometry comparison of DFTB2, DFTB3, DFTB2-D3H4, and DFTB3-D3(BJ) structures with of the 170 B3LYP optimized structures studied in our investigation and their RMSD of atomic position distribution.

**Table S5.** The mean absolute deviation, root-mean square deviation, and the maximum deviation of RMSD of atomic position values (Å) for DFTB2, DFTB3, DFTB2-D3H4, and DFTB3-D3(BJ) versus optimized B3LYP geometries.

|                  | Method |       |            |              |
|------------------|--------|-------|------------|--------------|
|                  | DFTB2  | DFTB3 | DFTB2-D3H4 | DFTB3-D3(BJ) |
| <i>All Atoms</i> |        |       |            |              |
| MAD              | 0.13   | 0.13  | 0.11       | 0.13         |
| RMSD             | 0.14   | 0.14  | 0.12       | 0.14         |

MAX

0.38

0.39

0.38

0.40

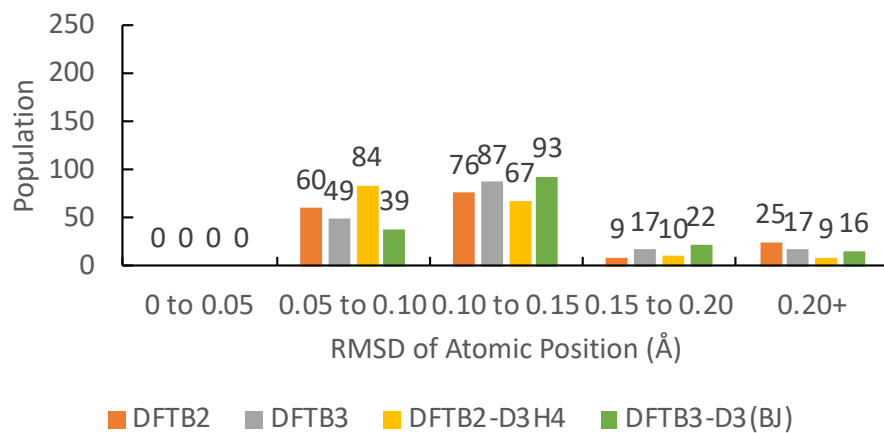

**Figure S10.** Distribution of geometries according to RMSD of atomic position values (hydrogen included) in vacuum with DFTB2-D3H4 and DFTB3-D3(BJ).

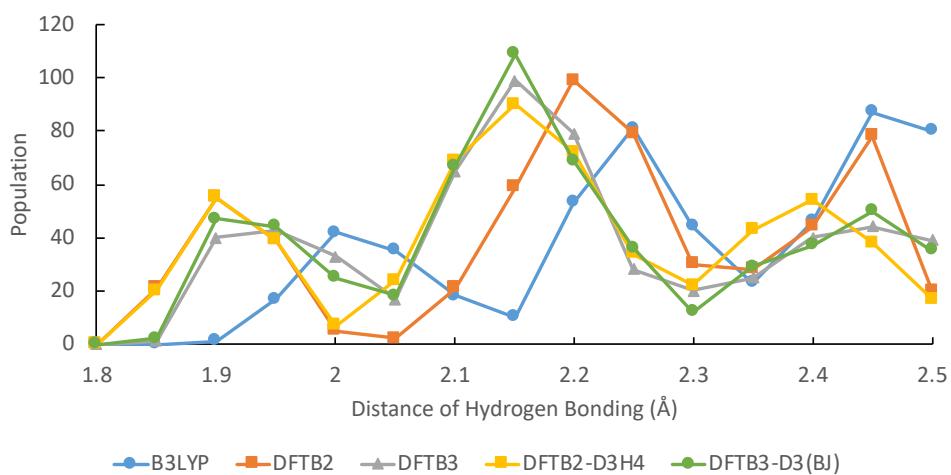

**Figure S11.** Distribution of hydrogen bonding distances in vacuum with DFTB2-D3H4 and DFTB3-D3(BJ).
